# Supplementary material
Source: PubMed Central journal article supplement (PMC3670399)
Supplement: 1219956110_pnas.201219956SI.pdf [file 1219956110_pnas.201219956SI.pdf]

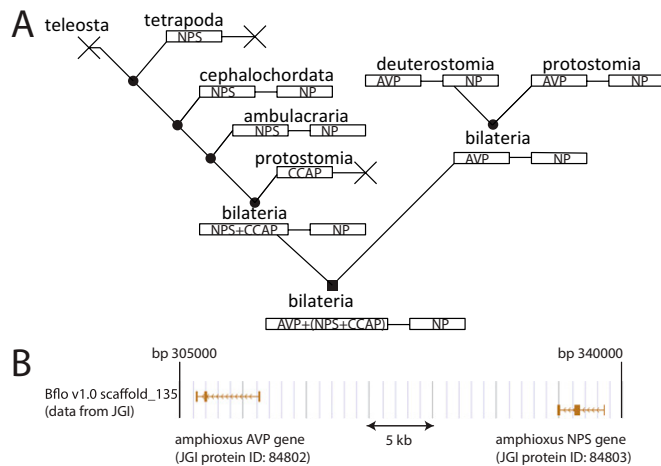

**Fig. 52.** Evolutionary scenario for NPS/CCAP neuropeptide precursors. (A) In an ancestor of extant bilaterians, a duplication of an AVP + NPS/CCAP-NP gene must have occurred, giving rise to an AVP-NP and NPS/CCAP-NP gene. The neurophysin domain was then lost independently in protostomes and tetrapods. This scenario is supported by both our receptor analysis, which shows a close association between bilaterian AVPR and NPSR, and (B) the neighboring tandem position of AVP and NPS peptide genes in the amphioxus genome, indicating that they are the product of an ancient duplication. AVP, arginine vasopressin; Bflo, *Branchiostoma floridae*; CCAP, crustacean cardioactive peptide; NPS, neuropeptide S; v1.0, version 1.0 of the Joint Genome Institute genome assembly.

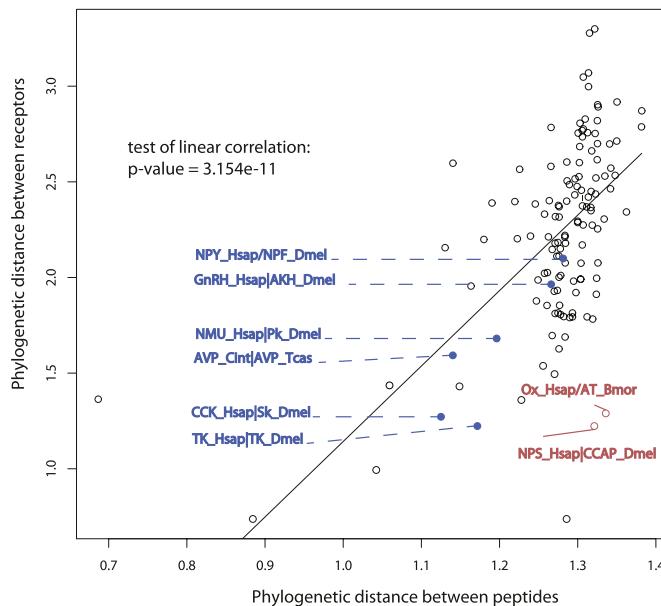

**Fig. 53.** Coevolution between peptides and receptors. A clear correlation between peptide distances and receptor distances across bilaterian peptidergic systems (PSs) ( $P = 3.1 \times 10^{-11}$ ) suggests that a majority of receptors from the rhodopsin  $\beta$  family have coevolved with their cognate ligands since the emergence of bilaterians. The distance between any two peptides or receptors is plotted on the x- and y-axes, respectively. This distance corresponds to the distance between leaves induced by the phylogenetic trees. Only known pairs of peptide-receptors according to the literature (supporting information is given at <http://neuroevo.org>) were considered. Blue points correspond to PSs that have already been hypothesized to be homologous, including mammalian CCK and ecdysozoan SK, or mammalian GnRH and ecdysozoan AKH (1). In red are shown the relationships between two systems [human orexin (Ox) versus silkworm allatotropin (AT) and human NPS vs. drosophila CCAP] for which receptors are clearly related, but for which no homology was detected between peptides with our procedure (Methods).

1. Janssen T, Lindemans M, Meelkop E, Temmerman L, Schoofs L (2010) Coevolution of neuropeptidergic signaling systems: From worm to man. *Ann N Y Acad Sci* 1200:1–14.
