# Supplementary material
Source: PubMed Central journal article supplement (PMC3670399)
Supplement: 1219956110_sd01.pdf [file 1219956110_sd01.pdf]

## Abbreviations of species names

| ABBREVIATION | SPECIES NAME                    | COMMON NAME                 | PHYLUM            |
|--------------|---------------------------------|-----------------------------|-------------------|
| Acal         | <i>Aplysia californica</i>      | California sea hare         | <i>Mollusca</i>   |
| Agam         | <i>Anopheles gambiae</i>        | African malaria mosquito    | <i>Arthropoda</i> |
| Amel         | <i>Apis mellifera</i>           | Worker honeybee             | <i>Arthropoda</i> |
| Apis         | <i>Acyrtosiphon pisum</i>       | Pea aphid                   | <i>Arthropoda</i> |
| Apom         | <i>Alvinella pompejana</i>      | Pompeii worm                | <i>Annelida</i>   |
| Asch         | <i>Acanthopagrus schlegelii</i> | Japanese black porgy        | <i>Chordata</i>   |
| Bflo         | <i>Branchiostoma floridae</i>   | Lancelet/Amphioxus          | <i>Chordata</i>   |
| Bmor         | <i>Bombyx mori</i>              | Silk moth                   | <i>Arthropoda</i> |
| Bpli         | <i>Brachionus plicatilis</i>    | Marine rotifer              | <i>Rotifera</i>   |
| Bvar         | <i>Bombina variegata</i>        | Fire-belly toad             | <i>Chordata</i>   |
| Cele         | <i>Caenorhabditis elegans</i>   | Caenorhabditis elegans      | <i>Nematoda</i>   |
| Cgig         | <i>Crassostrea gigas</i>        | Giant oyster                | <i>Mollusca</i>   |
| Cint         | <i>Ciona intestinalis</i>       | Sea squirt/ascidian         | <i>Chordata</i>   |
| Ctel         | <i>Capitella telata</i>         | Capitella                   | <i>Annelida</i>   |
| Dmel         | <i>Drosophila melanogaster</i>  | Fruit fly                   | <i>Arthropoda</i> |
| Dple         | <i>Danaus plexippus</i>         | Monarch butterfly           | <i>Arthropoda</i> |
| Dpon         | <i>Dendroctonus ponderosae</i>  | Mountain pine beetle        | <i>Arthropoda</i> |
| Dpul         | <i>Daphnia pulex</i>            | Water flea                  | <i>Arthropoda</i> |
| Drer         | <i>Danio rerio</i>              | Zebrafish                   | <i>Chordata</i>   |
| Ecom         | <i>Eurythoe complanata</i>      | Common fireworm             | <i>Annelida</i>   |
| Ggal         | <i>Gallus gallus</i>            | Chicken                     | <i>Chordata</i>   |
| Gros         | <i>Globodera rostochiensis</i>  | Yellow potato cyst nematode | <i>Nematoda</i>   |
| Hasi         | <i>Haliotis asinina</i>         | Donkey's ear abalone        | <i>Mollusca</i>   |
| Hdiv         | <i>Haliotis diversicolor</i>    | Abalone                     | <i>Mollusca</i>   |
| Hduj         | <i>Hypsibius dujardini</i>      | Waterbear                   | <i>Tardigrada</i> |
| Hmel         | <i>Heliconius Melpomene</i>     | Postman butterfly           | <i>Arthropoda</i> |
| Hrob         | <i>Helobdella robusta</i>       | Californian leech           | <i>Annelida</i>   |
| Hsap         | <i>Homo sapiens</i>             | Human                       | <i>Chordata</i>   |
| Hvit         | <i>Homalodisca vitripennis</i>  | Glassy-winged sharpshooter  | <i>Arthropoda</i> |
| Iobs         | <i>Ilyanassa obsoleta</i>       | Mud snail                   | <i>Mollusca</i>   |
| Ipar         | <i>Idiosepius paradoxus</i>     | Northern pygmy squid        | <i>Mollusca</i>   |
| Ipun         | <i>Ictalurus punctatus</i>      | Channel catfish             | <i>Chordata</i>   |
| Isca         | <i>Ixodes scapularis</i>        | Deer tick                   | <i>Arthropoda</i> |
| Lgig         | <i>Lottia gigantea</i>          | Giant owl limpet            | <i>Mollusca</i>   |
| Llon         | <i>Lutzomyia longipalpis</i>    | Sand fly                    | <i>Arthropoda</i> |
| Lmig         | <i>Locusta migratoria</i>       | Migratory locust            | <i>Arthropoda</i> |
| Lsta         | <i>Lymnaea stagnalis</i>        | Great pond snail            | <i>Mollusca</i>   |
| Mdom         | <i>Monodelphis domestica</i>    | Gray short-tailed opossum   | <i>Chordata</i>   |

|      |                                      |                          |                      |
|------|--------------------------------------|--------------------------|----------------------|
| Minc | <i>Meloidogyne incognita</i>         | Root-knot nematode       | <i>Nematoda</i>      |
| Name | <i>Necator americanus</i>            | Hookworm                 | <i>Nematoda</i>      |
| Oarc | <i>Onychiurus arcticus</i>           | Springtail               | <i>Arthropoda</i>    |
| Oana | <i>Ornithorhynchus anatinus</i>      | Platypus                 | <i>Chordata</i>      |
| Ocun | <i>Oryctolagus cuniculus</i>         | Rabbit                   | <i>Chordata</i>      |
| Olat | <i>Oryzias latipes</i>               | Medaka fish              | <i>Chordata</i>      |
| Onub | <i>Ostrinia nubilalis</i>            | European corn borer      | <i>Arthropoda</i>    |
| Ovul | <i>Octopus vulgaris</i>              | Common octopus           | <i>Mollusca</i>      |
| Pmai | <i>Peregrinus maidis</i>             | Maize planthopper        | <i>Arthropoda</i>    |
| Pmar | <i>Petromyzon marinus</i>            | Sea lamprey              | <i>Chordata</i>      |
| Pmon | <i>Penaeus monodon</i>               | Giant tiger prawn        | <i>Mollusca</i>      |
| Ppac | <i>Pristionchus Pacificus</i>        | Nematode                 | <i>Nematoda</i>      |
| Psau | <i>Phyllomedusa sauvagei</i>         | Sauvage's leaf frog      | <i>Chordata</i>      |
| Psed | <i>Peripatopsis sedgwicki</i>        | Velvet worm              | <i>Onychophora</i>   |
| Psin | <i>Pelodiscus sinensis</i>           | Chinese softshell turtle | <i>Chordata</i>      |
| Rpro | <i>Rhodnius prolixus</i>             | Triatomid bug            | <i>Arthropoda</i>    |
| Skow | <i>Saccoglossus kowalevskii</i>      | Acorn worm               | <i>Hemichordate</i>  |
| Spur | <i>Strongylocentrotus purpuratus</i> | Purple sea urchin        | <i>Echinodermata</i> |
| Tcas | <i>Tribolium castaneum</i>           | Red flour beetle         | <i>Arthropoda</i>    |
| Tspi | <i>Trichinella spiralis</i>          | Whipworm                 | <i>Nematoda</i>      |
| Turt | <i>Tetranychus urticae</i>           | Red spider mite          | <i>Arthropoda</i>    |
| Vphi | <i>Venerupis philippinarum</i>       | Manila clam              | <i>Mollusca</i>      |
| Xind | <i>Xiphinema index</i>               | Fan-leaf virus nematode  | <i>Nematoda</i>      |

## Abbreviations of peptide names

AVP, vasopressin; Oxt, Oxytocin; TK, Tachykinin; GnRH, Gonadotropin-Releasing hormone; Crz, Corzaonin; CCK, Cholecystokinin; SK, Sulfakinin; NMU, Neuromedin U; Neuromedin S, NMS; Ple, Pleurin; Pk, Pyrokinin; NPY, Neuropeptide Y; PYY, Peptide Tyrosine Tyrosine; PAHO, Pancreatic Hormone; NPF, Neuropeptide F; HCRT, Hypocretin/Orexin; AT, Allatotropin; CRH, Corticotropin-Releasing Hormone; UCN, Urocortin; ELH, Egg-Laying Hormone; DH44, Diuretic Hormone 44; CGRP, Calcitonin Gene-Related Peptide; Calc, Calcitonin; IAPP, Islet Amyloid Polypeptide; ADML, Adrenomedullin; ADM2, Adrenomedullin 2; DH31, Diuretic Hormone 31; NPS, Neuropeptide S; CCAP, Crustacean Cardioactive Peptide; NPFF, Neuropeptide FF; SIFa, SIFamide peptide; NMB, Neuromedin B; GRP, Gastrin-Releasing Peptide; CCHa, CCHamide peptide; Gal, Galanin; Galp, Galanin-like Peptide; Buc, Buccalin; TRH, Thyrotropin-Releasing Hormone; KiSS1, Metastin/Kisspeptin; QRFP, Ox26/RF-amide family 26 amino acid peptide; PTHY, Parathyroid Hormone; PTH, Parathyroid Hormone; PTHrP1, Parathyroid Hormone related Peptide 1; TIP39, Tuberoinfundibular Peptide 39/PTH2; GIP, Gastric Inhibitory Peptide; PACAP, Pituitary Adenylate Cyclase-Activating Peptide; VIP, Vasoactive Intestinal Peptide; PHM, Peptide Histidine-Methionine; Sct, Secretin; Gcg, glucagon; GLP, Glucagon-Like Peptide; Lk, Leucokinin; ETH, Ecdysis-Trigginger Hormone; Ple, Pleurin; Lq, Luqin; RYa, RYamide peptide; Prct, Proctolin; PDF, Pigment-Dispersing factor;

## Color coding in alignments of homologous precursor sequences

Signal peptides are indicated in blue, dibasic residues (Lys/K and Arg/R) in red, Cysteines in purple, conserved C-terminal features (e.g. RFamides) in green. C-terminal amidation was not indicated; instead glycine residues just before dibasic cleavage sites were highlighted in orange in precursor sequences. Signal peptides were verified using SignalP 4.0 (Petersen, Brunak et al. 2011).

# 1. Alignment of bilaterian Vasopressin (AVP)-like precursors (family 1)

```

                *           20           *           40           *           60           *
AVP_Hsap  -----*-----MPDTMLPACFLGLLAFSSACCYFQNCPRCGKRA-----MSDLELRQ
Oxt_Hsap  -----*-----MAGPSLACCLLGLLALTSACYIQNCPLCGKRA-----APDLLDVR-----K
Vtc_Trub  -----*-----MPQCALLLSLLGLLALSSACYIQNCPRCGKRA-----LPETGIR-----Q
Iso_Trub  -----*-----MTGTAISVCLLFLLSVCSACYISNCPICGKRS-----IMDAPQRK
AVP_Cint  -----*-----MYRQFSIVLILLANSILIDACCFFRDCSNMDWYRKRGQEITDPRKQLFQELPEFLDNRPFQ
AVP_Bflo  -----*-----MWRFGMVLVSVLLLVVVAATVGHSACYIINCPRCGKRA-----LENRSGP---AARE
AVP_Skow  -----*-----MFGTPERLSWKVLTIAVIFVCATTTCEACFISDCARGCGKRS-----PGSALTGAGHPLRQ
AVP_Spur  -----*-----MMSVKSIVTCLFSLVLALWIGGSFACFISNCPKCGKRS-----NSRPLR-----Q
AVP_Ctel  MRHSSDAVNSVVLCGRLLLLFACISCCIETTSGCFIRNCPICGKRS-----SVPSRIS---AQKE
AVP_Lgig  -----*-----MCFSSFQYILSLFVFMCVIFGANSCFIRNCPTCGKRA-----IEASEIG-----HK
AVP_Dpul  -----*-----MAGLWTFCLIALSMTEMIIPLTAKPCFIINCPPGCGKRS-----SQLVEPS---SYLE
AVP_Tcas  -----*-----MSTIITSIILLVLSESLVSGCLITNCPRCGKRS-----KFAISEN---AVKP
AVP_Cele  -----*-----MGSSPILLVLAISIGLASACFINSCPYRRYGRTI-----R
<----- signal peptide -----> vasopressin-like

```

```

                80           *           100           *           120           *           140
AVP_Hsap  CLPCGPGGKRC--FCPSICCAD---ELGCFVGTAEALRCQEENYLP--SP-----CQSGQKAC----GS
Oxt_Hsap  CLPCGPGGKRC--FCPNICCAE---ELGCFVGTAEALRCQEENYLP--SP-----CQSGQKAC----GS
Vtc_Trub  CMSCGPRDRRC--FCPNICCGE---GLGCLMGSPETARCAGENYLL--TP-----CQAGGRPC----GSE
Iso_Trub  CMSCGPGDRRC--FCPGICCGE---SFGCLMGSPESARCAEENYLL--TP-----CQAGGRPC----GSE
AVP_Cint  CNKDESNTGNECKFSQKICCQETDDGQVICAVSATELQHRFLSSGVLQQVQRILHEFVEISSRGA---PQK
AVP_Bflo  CPRCGPSLSQCIGPTT--CCSP---QAGCTRSLRVALECSMENLVP--VP-----CRLSGPSC--TLPGQQ
AVP_Skow  CISCGSNNSGHC--IGPSICCGD---FGCYFGTQETAVCQEEKSIP--VP-----CESKGTPC--GEYG
AVP_Spur  CLECGPGGVRC--MEPGICCGP---TIGCHINTQHTLSCMRENEIS--TP-----CELPGNPC---QTVP
AVP_Ctel  CMACCGENGLQC--VGPNTCCGQ---DIGCFMGTQEAKMGEENDSP--IP-----CRVDGAAC---GRND
AVP_Lgig  CMSCGPGNVEQ--VGPNICCGR---FGCYIGTKETEICEHENDST--VA-----CRVEGKLC---GSRQ
AVP_Dpul  CAPCGPAGKGTC--LGANLCCGS---HFGCFFKTEETNVCLLTNLKSTQICNQHFWKTDLKSASCSLNGDKI
AVP_Tcas  CVSCGPGQSEQ--FCPSICCGP---FGCLVGTPETLRCQREGFFHEREP-----CIAGSAPC---RKN
AVP_Cele  CSSCGIENEEVC--ISEGRCCTN---EECFMSTE---CSYSAVCPELF-----CKIGHHP-----
<----- signal peptide -----> neurophysin -----

```

```

                *           160           *           180           *           200           *
AVP_Hsap  GGRCAAFGVCC-NDESCVTEPEC-REGFHRRARASDRSNATQLDGPAGALLLRLVQLAGAPEPFEPAQPDAY
Oxt_Hsap  GGRCAVLGLCC-SPDGCHADPAC-----DAEATSQR~~~~~
Vtc_Trub  GGRCAVSGLCC-NSESCAVDSDC-----LGETEALEPGDSSAGSSPTELLLRLLHMSSRVEPHKCTLI~~~
Iso_Trub  GGRCASSGLCC-DAESCTMDQSC-----LSEEEGDERGSLFDGSDSGDVILKLLRLAGLTSPHQTH----
AVP_Cint  RRYCIKVGVC-SWDRCRPQVSC-----SYKDQDIPSHKEVFQDQTALVNRISHLLQDMY~~~~~
AVP_Bflo  TGTCVGEGMCCMDGEKCSLSPEC-----SMRTAEDEEARRQERRSVLPNWVLPGNTPPDIQKWW~~~
AVP_Skow  HCNCVADKICC-EEYNCSYDANC-----TTKNDGFQKADSSSSTAFKRAFKDLLEDK~~~~~
AVP_Spur  SGTCGAMGVCC-NSNSCSEDASCLMIEEDDSLKRFEQMSREENGSTRKDLRVKLLDLLNMQDQ~~~~~
AVP_Ctel  GGRCVAEQICC-NEDKCSHDSSC-----QSKAKRQHDNLSQDLLRYMHQLMTLKSLGRR~~~~~
AVP_Lgig  QQCVANGICC-DS~~~~~
AVP_Dpul  DGICVADLLCC-SLGNLPQDDL~~~~~
AVP_Tcas  TERCAFDGICC-SQDSCHADKSC-----ASDDKSPIDLYTLINYQAELAGDK~~~~~
AVP_Cele  GYCMKKGYCC-TQGGCQTSAMC~~~~~
<----- signal peptide ----->

```

## 2. Alignment of bilaterian Tachykinin-like peptides (family 2)

|            | *               | 20                          |
|------------|-----------------|-----------------------------|
| Tk1_Hsap   | ~~~~~H----      | KTDSEVGI <b>MG</b>          |
| Tk3_Hsap   | ~~~~~D----      | MHDFE <b>VGIMG</b>          |
| Tk4_Hsap   | ~~~~~ASQ        | EF <b>GI</b> MG             |
| Tk_1_Trub  | ~~~~~P----      | RPHQ <b>FI</b> GI <b>MG</b> |
| Tk_2_Trub  | ~~~~~H----      | KINSE <b>VGIMG</b>          |
| Tk_1_Drer  | ~~~~~P----      | RPHQ <b>FI</b> GI <b>MG</b> |
| Tk_2_Drer  | ~IYLH----       | KINSE <b>VGIMG</b>          |
| Tk_1_Cint  | ~~~~~HVR        | HE <b>YGI</b> MG            |
| Tk_2_Cint  | SIGDQPSIFNERASE | <b>ETGI</b> MG              |
| Tk_1_Ctel  | ~~~~~LSR        | GF <b>YA</b> ARG            |
| Tk_2_Ctel  | ~~~~FS----      | PKSE <b>HFS</b> RG          |
| Tk_3_Ctel  | ~~~~AY----      | PSGF <b>TM</b> PRG          |
| Tk_4_Ctel  | ~~~~RV----      | PLGF <b>Q</b> MVRG          |
| Tk_5_Ctel  | ~~~~GL----      | NKSSE <b>FL</b> ARG         |
| Tk_1_Apom  | ~~~~LN----      | PASE <b>SF</b> NRG          |
| Tk_2_Apom  | ~~~~AP----      | PSGF <b>NG</b> VVRG         |
| Tk_3_Apom  | ~~~~RP----      | PAGY <b>VV</b> VVRG         |
| Tk_4_Apom  | ~~~~VP----      | PSGF <b>TG</b> LVRG         |
| Tk_5_Apom  | ~~~~SP----      | PEGF <b>L</b> GLRG          |
| Tk_Ovul    | ~~~~SEVKPPSSSE  | <b>FI</b> GI <b>MG</b>      |
| Tk1_1_Lgig | ~~~~HP----      | NFG <b>EM</b> GSRG          |
| Tk1_2_Lgig | ~~~~QP----      | AFGF <b>HA</b> VVRG         |
| Tk2_1_Lgig | ~~~~QR----      | TFGF <b>VG</b> TRG          |
| Tk2_2_Lgig | ~~~~QP----      | HLGF <b>HG</b> MVRG         |
| Tk2_Lgig   | ~~~~GL----      | DQYGF <b>TG</b> QLG         |
| Tk_1_Acal  | ~~~~FK----      | PSGF <b>EM</b> GSRG         |
| Tk_2_Acal  | ~~~~QP----      | HLGF <b>HG</b> SRG          |
| Tk_1_Dple  | ~~~~V-----      | PQGF <b>L</b> GMVRG         |
| Tk_2_Dple  | ~~~~K-----      | PQGF <b>VG</b> VK <b>G</b>  |
| Tk_3_Dple  | ~~~~V-----      | PMGF <b>VG</b> MVRG         |
| Tk_4_Dple  | ~~~~~A----      | NIHK <b>EF</b> GVRG         |
| Tk_1_Pmai  | ~~~~AS----      | NMG <b>FV</b> GMVRG         |
| Tk_2_Pmai  | ~~~~~AM         | <b>FV</b> GMVRG             |
| Tk_3_Pmai  | ~~~~~AV         | <b>FV</b> GMVRG             |
| Tk_4_Pmai  | ~~~~~TM         | <b>FV</b> GMVRG             |
| Tk_5_Pmai  | ~~~~~AK         | <b>FV</b> GMVRG             |
| Tk_6_Pmai  | ~~~~~AV         | <b>EM</b> GMVRG             |
| Tk_7_Pmai  | ~~~~~AM         | <b>FQ</b> GMVRG             |
| Tk_1_Onub  | ~~~~V-----      | PQGF <b>VG</b> MRG          |
| Tk_2_Onub  | ~~~~K-----      | PQGF <b>VG</b> VK <b>G</b>  |
| Tk_3_Onub  | ~~~~A-----      | PMGF <b>VG</b> MRG          |
| Tk_4_Onub  | ~~~~AA----      | NIHQ <b>EF</b> GVRG         |
| Tk_1_Dpul  | ~~~~TP----      | NSRA <b>FL</b> GMVRG        |
| Tk_2_Dpul  | ~~~~KM----      | HGE <b>KFL</b> GMVRG        |
| Tk_3_Dpul  | ~~~~AP----      | SSNS <b>EM</b> GMVRG        |
| Tk_1_Tcas  | ~~~~A-----      | PSGF <b>EM</b> GMVRG        |
| Tk_2_Tcas  | ~~~~A-----      | PMGF <b>EM</b> GMVRG        |
| Tk_3_Tcas  | ~~~~A-----      | PSGF <b>F</b> GMVRG         |
| Tk_4_Tcas  | ~~~~MP----      | RQAG <b>FF</b> GMVRG        |
| Tk_5_Tcas  | ~~YPYQ----      | FRG <b>KE</b> VGVVRG        |
| Tk_1_Dmel  | ~~~~AP----      | TSSE <b>FI</b> GMVRG        |
| Tk_2_Dmel  | ~~~~A-----      | PLA <b>FV</b> GLVRG         |
| Tk_3_Dmel  | ~~~~A-----      | PTGF <b>T</b> GMVRG         |
| Tk_4_Dmel  | ~~~~AP----      | VNSE <b>FV</b> GMVRG        |
| Tk_5_Dmel  | ~~~~A-----      | PNG <b>F</b> LGMVRG         |
| Tk_Cele    | ~~~~VP----      | MMS <b>LK</b> GLVRG         |
| Tk_Ppac    | ~~~~~AP         | <b>E</b> K <b>L</b> VRG     |

### 3. Alignment of bilaterian GnRH-like peptides (family 3)

\*

|            |   |     |           |          |       |
|------------|---|-----|-----------|----------|-------|
| GnRH_Hsap  | Q | --  | HWSYGLR   | PGG      | ~~~~~ |
| GnRH2_Hsap | Q | --  | HWSHWYP   | PGG      | ~~~~~ |
| GnRH_Pmar  | Q | --  | HWSHWFP   | PGG      | ~~~~~ |
| GnRH1_Cint | Q | --  | HWSKGYSP  | PGG      | ~~~~~ |
| GnRH2_Cint | Q | --  | HWSLALSP  | PGG      | ~~~~~ |
| GnRH3_Cint | Q | --  | HWSNWWIP  | CAPGYNGG |       |
| GnRH2_Csav | Q | --  | HWSNKLAP  | PGG      | ~~~~~ |
| GnRH_Spur  | Q | VH  | HREFSGWR  | PGG      | ~~~~~ |
| GnRH1_Ctel | Q | AY  | HFSHWFP   | PGG      | ~~~~~ |
| GnRH_Apom  | Q | AY  | HFSNGWFP  | PGG      | ~~~~~ |
| GnRH_Ovul  | Q | NY  | HFSNGWHP  | PGG      | ~~~~~ |
| GnRH_Acal  | Q | NY  | HFSNGWYAG | ~~~~~    |       |
| GnRH2_Lgig | Q | HY  | HFSNGWKS  | PGG      | ~~~~~ |
| CORZ_Dmel  | Q | TFQ | YSRGWTN   | C        | ~~~~~ |

#### 4. Alignment of bilaterian Cholecystinin/Sulfakinin-like peptides (family 4)

\*

```

CCK_Hsap      ~~~~~~DYM-GWMDFG
CCK_Drer      ~~~~~~DYV-GWMDFG
CCK_Ipun      ~~~~~~DYL-GWMDFG
CCK_Cint      ~~~~~~NYY-GWMDFG
CCK2_Skow     ~~~~~~DHY-GWMNE~
CCK1_Spur     ~~~~~~DYG-HGMFFG
CCK2_Spur     ~~~~~~PDDYNW-GMWEF
CCK3_Spur     ~~~~DKADLYGW-GGFFG
CCK_Ctel      QGAAWDM-DYGWGGGRFG
CCK_2_Lgig    ~~~~~~F-DYNFGGGRWG
CCK_2_Hdiv    ~~~~~~NYGEYGFGGGRFG
CCK_1_Lgig    QG-AWDY-DYGLGGGRFG
CCK_1_Acal    QG-AWSY-DYGLGGGRFG
CCK_1_Hdiv    QG-AWSY-DYGLGGGRFG
CCK_2_Acal    ~~~~~~SYGDYGI GGGRFG
CCK_Apom      QG-AWDM-DYGWGGGRF~
Sk_Dmel       ~~~~~~FDDYG--HMREFG
Sk_Dpul       ~~~~~~FDDYG--HMREFG
  
```

## 5. Alignment of bilaterian NMU/Pyrokinin-like peptides (family 5)

|            | *     | 20                                 | *    |
|------------|-------|------------------------------------|------|
| NMU_Hsap   | ~~~~~ | FRVDEEFQSPFASQSRGYFLFRPRNG         |      |
| NMS_Hsap   |       | ILQRGSGTAAVDFTKKDHTATWGRPFFLFRPRNG |      |
| NMU_Drer   | ~~~~~ | ENLQGPGRIQSRGYFLYRPRNG             |      |
| Pk1_1_Lgig | ~~~~~ | ~~~~~MNYMAFPRLG                    |      |
| Pk1_2_Lgig | ~~~~~ | ~~~~~SGYLAFPRLG                    |      |
| Pk2_Lgig   | ~~~~~ | SAGRFRYYPEVRSEERAVALPRFG           |      |
| Pk1_1_Dpul | ~~~~~ | ~~~~~QSLIPFPRVG                    |      |
| Pk1_2_Dpul | ~~~~~ | ~~~~~HLIPFPRVG                     |      |
| Pk1_3_Dpul | ~~~~~ | ~~~~~QNLIPFPRVG                    |      |
| Pk_Tcas    | ~~~~~ | SENFTPWAYIILNGEAPIIREVHYS          | PRLG |
| Capa_Dmel  | ~~~~~ | ~~~~~TGPSASSGLWFG                  | PRLG |
| Hugin_Dmel | ~~~~~ | ~~~~~SVPFK                         | PRLG |
| Pk1_2_Cele | ~~~~~ | ~~~~~LYMAR                         | VG   |
| Pk1_3_Cele | ~~~~~ | ~~~~~AFFYT                         | PRIG |
| Pk1_1_Cele | ~~~~~ | ~~~~~LLVPY                         | PRVG |

## 6. Alignment of bilaterian NPY/NPF-like peptides (family 6)

```

                *           20           *           40           *           60
NPY_Hsap  -----MLGNKRLGLSGLTLALSLLVCLGALAEAYPSKFDNPGEDAPAEDMAR
PYY_Hsap  -----MVFVRRPWPALTTVLLALLVCLGALVDAYPEAPEAPREDASPEELNR
PAHO_Hsap  -----MAAARLCLSLLLLSTCVALLLQPLLGAQGAPLEFVYFGDNATPEQMAQ
NPY_Bflo  -----MTSVRIFSYVCLLVLIYACVEVTRAQEEEDVEAPEEGK
NPY_Skow  -----MDLKTILLASLVCMVVCWDERLSARVQRDASDYQAEPTAPSRGASLAEWDR
NPF1_Ctel  -----MKLSQILILLLLGLSVIICSVHANTDDDDARLVMVMSQMHPPEKRPEHFRNMDELNV
NPF2_Ctel  -----MDAKLLKAMFVLASCLLLLLPTSCSQDMHGMEVVRPKVFRNADELRM
NPF_Lgig  -----MQKLVLSLLILAAVVMLEVTSQDSMLAPEDRPSEFRSPDELRR
NPF_Dpul  MSSSNNSIQQFLPRSCSLAALVFLVMAVLAVCVTTTKADGGDVMSGGEGGEMTAMADAIK
NPF_Dmel  -----MCQTMRCILVACVALALLAAGCRVEASNSREPRKNDVNTMADAYK
                <----- signal peptide ----->                <--- ..

                *           80           *           100          *           120
NPY_Hsap  YYSALRHYINLITRQRYGKRSSPETLISDLLMRESTENVPRTRLEDPAMW-----
PYY_Hsap  YYASLRHYLNLVTRQRYGKRDGPDTLISKTFPPDGEDRPVRSRSEGPDLW-----
PAHO_Hsap  YAADLRRYINMLTRPRYGKRHKEDTLAFSEWGSPhAAVPRELSPLDL-----
NPY_Bflo  YYKNLANYLRLLITRQRYGRRSAPDYGSRTLYRHPPYPQDIVHTLDMDGISLSLCISLNL
NPY_Skow  YLRELSLYROYADIOFGGRSDGGANNIHQQTQKNHRSNIWDYLSKKLAL-----
NPF1_Ctel  YLDKLRQYTYIIGRPFGGRNVFSEVRVHTIVLYCFCQSR LAPIRCA-----
NPF2_Ctel  YLKALNEYFAIVGRPFYGKRS SPSENPAFGEVDVDGNGRVNDDEFDQFAYGYRK-----
NPF_Lgig  YLKALNEYYAIVGRPFYGGRSVNKRSAADYLEFKPSHKNDYEYLYDERDERFSPYY-----
NPF_Dpul  YLQGLRRYDNSLVRPFGYGRGRLPYFDMEDLPLHPQVCSSSSYF-----
NPF_Dmel  ELQDLDTYYGDRARVFGYGRGSLMDILRNHEMDNINLGKNANNGGEFARGFNEEEEIF-----
..neuropeptide F/Y->

```



## 7. Alignment of bilaterian Corticotropin-Releasing Hormone (CRH)/DH44 peptides (family 7 - bilaterian)

|               | *                | 20                  | *                | 40                  | *                      | 60                 |
|---------------|------------------|---------------------|------------------|---------------------|------------------------|--------------------|
| CRH_Hsap      | ~~~~~            | SEEPPI              | SIDLTFHL         | IRE---              | VLEMARAEQLAQQ          | AHS---NRKLMEIIG~~  |
| Sauvagin_Psau | ~~~~~            | QGPPIS              | IDLLELRK         | ---                 | MIEIEKQEKEKQQAAN       | ---NRLLDITIG~~     |
| UCN1_Hsap     | ~~~~~            | DNPSL               | SIDLTFHL         | LRT---              | LLELARTQSQRERAEQ       | ---NRIIFDSVIG~~    |
| UCN2_Hsap     | ~~~~~            | IVLSL               | DVPIGLIQI        | ---                 | LLEQARARAAREQATT       | ---NARILARVGHG     |
| UCN3_Hsap     | ~~~~~            | FTLSL               | DVPTNIMNL        | ---                 | LFNIAKAKNLRAQAAA       | ---NAHLMAQIG~~     |
| CRH1_Trub     | ~~~~~            | SEDPPI              | SIDLTFHL         | IRE---              | MMEMSKAEQLAQQ          | AQN---NRIMMELVIG~~ |
| CRH2_Trub     | ~~~~~            | SEEPPI              | SIDLTFHL         | LRK---              | MIKEAKMENQKEQELI       | ---NRKLIDEFC~~     |
| UCN_Trub      | ~~~~~            | SRLTL               | SLDVPTNIMNV      | ---                 | LFDVAKAKNLRAKAAE       | ---NARLLAHITIG~~   |
| CRH_Cint      | ~~~~~            | PALGRNPFL           | SLDVPLSFLSK      | ---                 | LMEVKRREEQRKIAKIKSVHNS | SSLMKRIG~~         |
| CRH_Csav      | ~~~~~            | AAKPKPQTNVL         | SLDVPLSFLSK      | ---                 | LIEMSRREDKRQREKEISL    | RNKKLMEKYIG~~      |
| CRH1_Skow     | ~~~~~            | NPTSGHS             | IGLSLDIIRDRLEKAE | SERMQQEKQSDINRYRQ   | NTELMTGLIG~~           |                    |
| ELH_Acal      | ~~~~~            | ISINQDLKAITD        | ---              | MLLTEQIRERQRYLAD    | ---LRPRILEKIG~~        |                    |
| ELH1_Lgig     | ~~~~~            | SRLSINQELKSLAN      | ---              | LLVLRENKRREAQKTK    | ---LRSKLLSITIG~~       |                    |
| ELH2_Lgig     | ~~~~~            | AGRLSINGALSSSLAD    | ---              | LLVSENQRRDRLESME    | ---LRQRIQYLIG~~        |                    |
| ELH1_Cgig     | ~~~~~            | GRLSITADLRSLAR      | ---              | MLEAHRKRFIASRFPYDS  | --IRKKLFRYIG~~         |                    |
| ELH2_Cgig     | ~~~~~            | QRLSVNGALSSSLAD     | ---              | MLAANGRQRMSEMAM     | ---NRQRLFGLIG~~        |                    |
| ELH_Lstag     | ~~~~~            | LSITNDLRAIADSY      | ---              | LYDQHKLRRERQEEEN    | -----LRRRFLELIG~~      |                    |
| DH44_Hmel     | ~~~~~            | KMPPLSINNPMEVLRQRL  | ---              | LLEVARKQMREANQRQAVA | -NRVFLQNVIG~~          |                    |
| DH44_Dmel     | ~~~~~            | NKPSLSIVNPLDVLRQRL  | ---              | LLEIARRQMKENSQVEL   | --NRAILKNVIG~~         |                    |
| DH44_Dpul     | QSQSHSGSSGNHHSQ  | LSIISPIEALRSRL      | ---              | RLEMLRRQYGNQIKQ     | -----NQDKLERVIG~~      |                    |
| DH44_Isca     | ~~~~~            | DHMPSLSIVSPLDVLRDK  | ---              | MMQDI IERSIKNKIQA   | ---NDKILKDLIG~~        |                    |
| DH44_Apis     | ~~~~~            | SRPSLSIVNSLDVLRQKL  | ---              | MYEVARRHVDENQKVL    | SQ--NHQILKNLIG~~       |                    |
| DH44_Turt     | ~~~~~            | GVSPRLSVTSPIAVLRDAL | ---              | MEEIKRKKIQETQAKIAL  | --NEKILKEVIG~~         |                    |
| DH44_Oarc     | IPEILEQPVPDSSGSL | SIVGPLDVLRQNM       | ---              | LMEMHKTRVRHAKNKIVES | -NREYLERIG~~           |                    |

## 8. Alignment of bilaterian Calcitonin/DH31 peptides (family 8 - bilaterian)

|             | *                                                                                       | 20                                                                           | *                                                               | 40                                                      | *                                                | 60                                  | *                  | 80                       |          |             |                       |       |
|-------------|-----------------------------------------------------------------------------------------|------------------------------------------------------------------------------|-----------------------------------------------------------------|---------------------------------------------------------|--------------------------------------------------|-------------------------------------|--------------------|--------------------------|----------|-------------|-----------------------|-------|
| CGRP1_Hsap  |                                                                                         | MGFQKFS                                                                      | PFLALSILVLLQAGSLHA                                              | APFRSALESSPADPATLSEDEARLLLAALVQNYVQMKASELEQEQEREGSRI    | IAQ                                              |                                     |                    |                          |          |             |                       |       |
| Calc_Hsap   |                                                                                         | MGFQKFS                                                                      | PFLALSILVLLQAGSLHA                                              | APFRSALESSPADPATLSEDEARLLLAALVQNYVQMKASELEQEQEREGSSLDSP |                                                  |                                     |                    |                          |          |             |                       |       |
| IAPP_Hsap   |                                                                                         | MGILKLQVFLIVLSVALNHLKATPIESHQVEK                                             | -----                                                           |                                                         |                                                  |                                     |                    |                          |          |             |                       |       |
| ADML_Hsap   |                                                                                         | MKLVSV                                                                       | ALMYLGLS                                                        | LAFLGADTARLDVASEFRKKWNKWALSRGKRELRMSSSYPTGLADV          | KAGPAQTLIRPQDMKGASRSP                            |                                     |                    |                          |          |             |                       |       |
| ADM2_Hsap   |                                                                                         | MARIPTAALGCISLLCLQLPGSLS                                                     | RS                                                              | LGDP                                                    | RPVKPREPPARSPSSSLQPRHPAPRPVWKLHRALQAQRGAGLAPVMGQ |                                     |                    |                          |          |             |                       |       |
| Calc_Cint   |                                                                                         | MVMNTFC                                                                      | SLLEFILLVFCVYNASTTGGIY                                          | NRL                                                     | LHPRGTGRQQLLYHNFNRYGEVLKRNQPSRSDYDTHDEL          | IKNVQPLQQ                           |                    |                          |          |             |                       |       |
| Calc1_Bflo  |                                                                                         | MMTTEVGRFLLCACVTF                                                            | SILLTTCTAAPT                                                    | TARGELPEASLRLSEEDVGRVVSAMAREVLQIVNENVDKLAQPNEFGYGLDG    |                                                  |                                     |                    |                          |          |             |                       |       |
| Calc2_Bflo  |                                                                                         | MLLGNMLVNTVAALTVCVVVFWGTDHVGAL                                               | PRPADDGDNPLAMTNSDMRRI                                           | V                                                       | SALIREVDQLAAEKLAQAQRVFGPGIR                      | --                                  |                    |                          |          |             |                       |       |
| Calc3_Bflo  |                                                                                         | MRPCFALMVLAFFVLVHTNQLTASVIRRYDDD                                             | MYDYDGDMEPLLALLGQQAGRVYHGLARELLDNI                              | EDNTNTQDNRF                                             | SRT                                              |                                     |                    |                          |          |             |                       |       |
| Calc_Spur   |                                                                                         | MKSTVIVTLTICCLLYQTTRAASLTNRDGLSRQDILDLLQLYE                                  | EPIRQEGD-----                                                   |                                                         |                                                  |                                     |                    |                          |          |             |                       |       |
| Calc_Skow   |                                                                                         | MDRLIVASSAFLVILYITCFVDVTIAYDDSESE                                            | EVVPPNYWSLQLAELTELVKLGEEVLAQKASAEMKAA-----                      |                                                         |                                                  |                                     |                    |                          |          |             |                       |       |
| DH31_1_Ctel |                                                                                         | MYVQVLSLLLGCVLLGGR                                                           | ISEA                                                            | ADERE                                                   | SEDLQEALRVYQNLGETR                               | KGLTALKRVVSDLDGDILQKHDFHDLARKRKGLDI |                    |                          |          |             |                       |       |
| DH31_2_Ctel |                                                                                         | MVSQFLIESELS                                                                 | PRVLSIMNSAVMRFSLIAMASCIVIASLTSRAQATSLHRQRRDVTEPSLAI             | AVLEDLIMELRDEI                                          | HSK                                              |                                     |                    |                          |          |             |                       |       |
| DH31_1_Lgig |                                                                                         | MISTTPLYVTVSICLFYLT                                                          | TTTVYCR                                                         | TDFRFLMKRDTRNNINTDSLQETLKNLDDEYQRLQKRTCAFGINSHQCTLTSLNN |                                                  |                                     |                    |                          |          |             |                       |       |
| DH31_2_Lgig |                                                                                         | MGASILLGLTILLSYVNQVHLQMFHPRDISRGGQQQEEQLRRGYLIQILKSFLNRRQEDATEKR             | -----                                                           |                                                         |                                                  |                                     |                    |                          |          |             |                       |       |
| DH31_Dpul   |                                                                                         | MSRFVMTIFFLLVACLALIVPGSA                                                     | APRRPMLVDLDDPDSVMEVITRLERSLLRNSDYEHQ-----                       |                                                         |                                                  |                                     |                    |                          |          |             |                       |       |
| DH31_Dmel   |                                                                                         | MTNRCACFALAFLLFCLLAISSIEA                                                    | APMPRYQSNGGYGGAGYNELEEVDDLLMELMTRFRGTIIRARNDLENS-----           |                                                         |                                                  |                                     |                    |                          |          |             |                       |       |
| DH31_Cele   |                                                                                         | MSCSSSSMLFLVLIATTVLIAES                                                      | RVFYNRFDGGLSSDRFMEQKRDGAEASYDYDANQVIRNTM-----                   |                                                         |                                                  |                                     |                    |                          |          |             |                       |       |
|             |                                                                                         | <-- signal peptide -->                                                       |                                                                 |                                                         |                                                  |                                     |                    |                          |          |             |                       |       |
|             | * <td>100 <td>* <td>120 <td>* <td>140 <td>* <td>160 </td></td></td></td></td></td></td> | 100 <td>* <td>120 <td>* <td>140 <td>* <td>160 </td></td></td></td></td></td> | * <td>120 <td>* <td>140 <td>* <td>160 </td></td></td></td></td> | 120 <td>* <td>140 <td>* <td>160 </td></td></td></td>    | * <td>140 <td>* <td>160 </td></td></td>          | 140 <td>* <td>160 </td></td>        | * <td>160 </td>    | 160                      |          |             |                       |       |
| CGRP1_Hsap  |                                                                                         | -----                                                                        |                                                                 |                                                         |                                                  |                                     |                    |                          |          |             |                       |       |
| Calc_Hsap   |                                                                                         | RS                                                                           | -----                                                           |                                                         |                                                  |                                     |                    |                          |          |             |                       |       |
| IAPP_Hsap   |                                                                                         | -----                                                                        |                                                                 |                                                         |                                                  |                                     |                    |                          |          |             |                       |       |
| ADML_Hsap   |                                                                                         | EDSSPDAARIRV                                                                 | -----                                                           |                                                         |                                                  |                                     |                    |                          | KRYRQSMN | NFQ         |                       |       |
| ADM2_Hsap   |                                                                                         | PLRDGGRQHSGPRRHSGP                                                           | -----                                                           |                                                         |                                                  |                                     |                    |                          | RTQAQ    |             |                       |       |
| Calc_Cint   |                                                                                         | RQEEKLNKLEKLFADIMLEDNSYKNVLF                                                 | S                                                               | KKQESNEIDIEPSMMRDTRNNFLEMLQLSNWIHRVLSRLAATPHEQQAAPV     |                                                  |                                     |                    |                          |          |             |                       |       |
| Calc1_Bflo  |                                                                                         | LPQGPVY                                                                      | -----                                                           |                                                         |                                                  |                                     |                    |                          |          | K           |                       |       |
| Calc2_Bflo  |                                                                                         | -----                                                                        |                                                                 |                                                         |                                                  |                                     |                    |                          |          |             |                       |       |
| Calc3_Bflo  |                                                                                         | YEDMMDPMAM                                                                   | -----                                                           |                                                         |                                                  |                                     |                    |                          |          |             |                       |       |
| Calc_Spur   |                                                                                         | -----                                                                        |                                                                 |                                                         |                                                  |                                     |                    |                          |          |             |                       |       |
| Calc_Skow   |                                                                                         | -----                                                                        |                                                                 |                                                         |                                                  |                                     |                    |                          | KRG      |             |                       |       |
| DH31_1_Ctel |                                                                                         | LRRILSEMEADLIYEQ                                                             | -----                                                           |                                                         |                                                  |                                     |                    |                          |          |             |                       |       |
| DH31_2_Ctel |                                                                                         | K                                                                            | -----                                                           |                                                         |                                                  |                                     |                    |                          |          |             |                       |       |
| DH31_1_Lgig |                                                                                         | KMMSQAWLSDGMSPGKRSDLPNLT                                                     | PDGRTQ                                                          | RLLED                                                   | EMSNTKALLTVRDILTQADSPTAR                         | -----                               |                    |                          |          |             |                       |       |
| DH31_2_Lgig |                                                                                         | -----                                                                        |                                                                 |                                                         |                                                  |                                     |                    |                          |          |             |                       |       |
| DH31_Dpul   |                                                                                         | -----                                                                        |                                                                 |                                                         |                                                  |                                     |                    |                          |          |             |                       |       |
| DH31_Dmel   |                                                                                         | -----                                                                        |                                                                 |                                                         |                                                  |                                     |                    |                          |          |             |                       |       |
| DH31_Cele   |                                                                                         | -----                                                                        |                                                                 |                                                         |                                                  |                                     |                    |                          |          |             |                       |       |
|             | * <td>180 <td>* <td>200 <td>* <td>220 <td>* <td>240 </td></td></td></td></td></td></td> | 180 <td>* <td>200 <td>* <td>220 <td>* <td>240 </td></td></td></td></td></td> | * <td>200 <td>* <td>220 <td>* <td>240 </td></td></td></td></td> | 200 <td>* <td>220 <td>* <td>240 </td></td></td></td>    | * <td>220 <td>* <td>240 </td></td></td>          | 220 <td>* <td>240 </td></td>        | * <td>240 </td>    | 240                      |          |             |                       |       |
| CGRP1_Hsap  |                                                                                         | KRAC                                                                         | DTAT                                                            | CVTHRLAGLLSRS                                           | GGVVKNNFVPTNVGSKAF                               | GRRRR                               | DLQA               | ~~~~~                    |          |             |                       |       |
| Calc_Hsap   |                                                                                         | KRC                                                                          | GNLST                                                           | CMLGTYTQDFNKF                                           | HTFPQTAIGVGAP                                    | GKKR                                | DMSSDLERDHRPHVSMPQ | NAN-----                 |          |             |                       |       |
| IAPP_Hsap   |                                                                                         | KRC                                                                          | NTAT                                                            | CATQRLANFLVHS                                           | SNNFGAILSSTNVGSNTY                               | GKR                                 | NAVEVLKREPLNYLPL   | ~~~~~                    |          |             |                       |       |
| ADML_Hsap   |                                                                                         | LRSFGC                                                                       | RFGT                                                            | CTVQKLAHQIYQFTDKDKDNVAPRSKISPQGY                        | GRRRR                                            | SLPEAGPGRTLVS                       | SKPQAHGAPAPPSG     |                          |          |             |                       |       |
| ADM2_Hsap   |                                                                                         | LLRVGC                                                                       | VLGT                                                            | CQVQNL                                                  | SHRLWQL                                          | MG                                  | FAGRQ              | DSAPVDPSSPHSYG-----      |          |             |                       |       |
| Calc_Cint   |                                                                                         | TGKR                                                                         | C                                                               | DGVSTCWLHEL                                             | GNSVHAT                                          | AAGKQNVGFG                          | BGRK               | ~~~~~                    |          |             |                       |       |
| Calc1_Bflo  |                                                                                         | KGKIAC                                                                       | KTAW                                                            | CMNRLSHNLS                                              | SSL                                              | DNPTDTGVGAP                         | GKRKR              | DTS~~~~~                 |          |             |                       |       |
| Calc2_Bflo  |                                                                                         | KRDC                                                                         | STLT                                                            | CFNQKLAHEL                                              | AMD                                              | NQRTDTANPYS                         | GKRKR              | SAEEDDH~~~~~             |          |             |                       |       |
| Calc3_Bflo  |                                                                                         | RVRKRC                                                                       | ESGT                                                            | CVQMH                                                   | LADRLRLG                                         | LGHNMFTNTGPES                       | GKRKR              | SLGASRRAARL~~~~~         |          |             |                       |       |
| Calc_Spur   |                                                                                         | KRSKGC                                                                       | GSFSG                                                           | CMQMEVAKNRVAA                                           | LLRNSNAHLFGLNG                                   | GKRKR                               | SVDDL              | PQVNDAEETE~~~~~          |          |             |                       |       |
| Calc_Skow   |                                                                                         | RGTSAC                                                                       | GGFAT                                                           | CKQLEYGRKYATS                                           | KADLSHF                                          | GATS                                | GKRKR              | TTNSELDKQA~~~~~          |          |             |                       |       |
| DH31_1_Ctel |                                                                                         | KRTC                                                                         | QFNLGGH                                                         | CATE                                                    | SAASVADHW                                        | HYLNSPLS                            | GKRKR              | DTGLYKAVVSGRIFKDSKH~~~~~ |          |             |                       |       |
| DH31_2_Ctel |                                                                                         | KRC                                                                          | RFDAGYGSRYGVAQSVGSKLMAL                                         | -----                                                   |                                                  |                                     |                    | KQAADWNG                 | GKRKR    | EAEEEA~~~~~ |                       |       |
| DH31_1_Lgig |                                                                                         | KRSC                                                                         | SLRLGGM                                                         | CLTENL                                                  | NAAANQY                                          | EYLSSGLS                            | GKRKR              | SLRHILLNRXH~~~~~         |          |             |                       |       |
| DH31_2_Lgig |                                                                                         | KRSC                                                                         | NLNLGFH                                                         | CQTDEYSS                                                | IADMY                                            | DFLQSALS                            | GKRKR              | NVKIVSIEGS~~~~~          |          |             |                       |       |
| DH31_Dpul   |                                                                                         | KRC                                                                          | GVDFGLGRGYSGSQA                                                 | AKHLMGLA                                                | -----                                            |                                     |                    |                          | AANYAIG  | GKRKR       | DTTESTPEDVKTGAIN~~~~~ |       |
| DH31_Dmel   |                                                                                         | KRC                                                                          | TVDFGLARGYSGTQEA                                                | KHRMGLA                                                 | -----                                            |                                     |                    |                          | AANFAGG  | GRRRR       | SETDV~~~~~            |       |
| DH31_Cele   |                                                                                         | KRNRQC                                                                       | LLNAGLSQGC                                                      | DFSDLL                                                  | HAQTQA                                           | -----                               |                    |                          |          | RKFMSFAG    | GK                    | ----- |
|             |                                                                                         | <----- calcitonin peptide ----->                                             |                                                                 |                                                         |                                                  |                                     |                    |                          |          |             |                       |       |

## 9. Alignment of deuterostomian Hypocretin(HCRT)/Orexin-like peptides (family 9 - deuterostomian)

|          | *                                                                                                                  | 20                                          | *                                               | 40 | *                                                |
|----------|--------------------------------------------------------------------------------------------------------------------|---------------------------------------------|-------------------------------------------------|----|--------------------------------------------------|
| OxA_Hsap | ~QPLPD <b>CCRQ</b> -----                                                                                           | K <b>TCS</b> CRL <b>YELL</b> -----          |                                                 |    | HGAGN <b>HAAG</b> <b>GIL</b> TL <b>G</b>         |
| OxB_Hsap | ~~~~~ <b>RS</b> GP-----                                                                                            | PGL <b>QGR</b> L <b>QRL</b> L-----          |                                                 |    | QASGN <b>HAAG</b> <b>GIL</b> TM <b>G</b>         |
| OxA_Drer | ~~~~~ <b>S</b> CC <b>AR</b> -----                                                                                  | APGS <b>CKL</b> Y <b>EM</b> L-----          | CRAGRRNDSSVARHLVHLNNDAAV <b>GIL</b> TL <b>G</b> |    |                                                  |
| OxB_Drer | ~~~~~ <b>KV</b> GE-----                                                                                            | SRV <b>HD</b> RL <b>QQL</b> L-----          |                                                 |    | HNSRN <b>QAAG</b> <b>GIL</b> TM <b>G</b>         |
| Ox1_Bflo | SWAF <b>PR</b> CC <b>WR</b> -----                                                                                  | RTC <b>NC</b> PH <b>FRR</b> L-----          |                                                 |    | FGPRN <b>HGH</b> <b>GIL</b> TV <b>G</b>          |
| Ox2_Bflo | ~~ <b>QK</b> PACC <b>ES</b> -----                                                                                  | G <b>SC</b> IC <b>PY</b> VS <b>RL</b> ----- |                                                 |    | HSPGN <b>HGY</b> <b>GIL</b> TT <b>G</b>          |
| Ox_Skow  | ~~~ <b>QP</b> CC- <b>RG</b> VG <b>CK</b> IP <b>PN</b> CK <b>CP</b> F <b>Q</b> SI <b>I</b> -----                    |                                             |                                                 |    | CDN <b>P</b> TK <b>N</b> V <b>L</b> T <b>A</b> G |
| Ox1_Spur | ~~~ <b>Q</b> SP <b>CC</b> RR <b>AK</b> G <b>CS</b> F <b>PP</b> G <b>CH</b> CP <b>L</b> K <b>MS</b> F-----          |                                             |                                                 |    | CGD <b>P</b> SR <b>G</b> L <b>Q</b> IV <b>G</b>  |
| Ox2_Spur | ~~~ <b>D</b> RA <b>CC</b> K <b>R</b> TV <b>GC</b> N <b>L</b> R <b>SD</b> CT <b>CR</b> I <b>R</b> E <b>I</b> T----- |                                             |                                                 |    | CTD <b>P</b> SL <b>G</b> L <b>Q</b> NY <b>G</b>  |

## 10. Alignment of deuterostomian Allatotropin-like peptides (family 9 - protostomian)

\*

|         |   |   |   |   |   |   |   |   |   |   |   |   |   |   |   |
|---------|---|---|---|---|---|---|---|---|---|---|---|---|---|---|---|
| AT_Mgal | G | F | L | A | G | V | H | D | R | M | G | H | G | F | G |
| AT_Lsta | G | F | R | A | N | S | A | S | R | V | A | H | G | Y | G |
| AT_Acal | G | F | R | L | N | S | A | S | R | V | A | H | G | Y | G |
| AT_Lgig | G | F | K | A | N | S | A | S | R | V | A | H | G | Y | G |
| AT_Ctel | G | E | R | M | G | A | A | D | R | F | S | H | G | F | G |
| AT_Apom | G | E | R | L | G | A | A | D | R | F | S | H | G | F | G |
| AT_Hrob | S | E | K | L | Y | D | N | S | R | Y | A | H | G | Y | G |
| AT_Bmor | G | F | K | - | N | V | E | M | M | T | A | R | G | F | G |
| AT_Rpro | G | F | K | - | N | V | Q | L | S | T | A | R | G | F | G |
| AT_Apis | G | F | K | - | N | M | D | L | S | T | A | R | G | F | G |
| AT_Dpul | G | F | K | - | T | V | G | L | A | T | A | R | G | F | G |
| AT_Hvit | G | F | K | - | N | H | A | L | S | T | A | R | G | F | G |

11. Alignment of protostomian Allatotropin-like precursors with Saccoglossus orexin-like precursor (family 9 - bilaterian)

|         |       |                 |                                 |                         |                       |       |               |             |               |               |
|---------|-------|-----------------|---------------------------------|-------------------------|-----------------------|-------|---------------|-------------|---------------|---------------|
|         |       | *               | 20                              | *                       | 40                    | *     | 60            | *           |               |               |
| AT_Rpro | ---   | MMRWSSLLVLVALAS | I                               | INCIKAGSPSSALYSSAARASGR | RTI                   | RGFK  | -NVQLSTARGE   | GKR         | TYPDSQLQP---- |               |
| AT_Hvit | ----- | MRVYTL          | LLLVLLMSVTANS                   | VPVYL                   | LRDKP                 | RSI   | RGFK          | -NHALSTARGE | GKR           | SDSELSSE----  |
| AT_Apis | MAVNN | NIMVRL          | LVIETFLILAVVNSYPAFEDSEFKHKHRDKG | FTI                     | RGFK                  | -NMDL | STARGE        | GKR         | TDHYMNLMP---- |               |
| AT_Bmor | ----- | MNLTMQ          | LEVIVAVCLVLAEG                  | APDVRL                  | VRTKQQ                | RPT   | RGFK          | -NVEMMTARGE | GRR           | DRPHPRAELYGLD |
| AT_Lsta | ----- | MSRTSL          | TLQVGVLLAICLFDITYADERIH         | RQ                      | RGFRANSASRVAHGY       | GKR   | GYLSSNENLPTLS |             |               |               |
| AT_Acal | ----- | MLSAP           | SIAHTGVALLVLMCLCPFSQSTEASLS     | RA                      | KRGFRINSASRVAHGY      | GKR   | GYASSSGAVPYPE |             |               |               |
| AT_Lgig | ----- | MKLTL           | VLVTVTLTITILANAYPQSPSLSHH       | RS                      | KRGFKANSASRVAHGY      | GKR   | GFPSWKNY----  |             |               |               |
| AT_Ctel | ----- | MKVSIC          | FIVVALVVCIEVMTSHAANLS           | RS                      | KRGFRMGAA             | DRF   | SHGE          | GKR         | G-----        |               |
| Ox_Skow | ---   | MRTTIM          | LIFSAVLVAVLFTHTSA               | QPQC                    | CRGVGCKIPPNCKCPFQSIIC | D     | NPTKNVLT      | A           | GKR           | NYLPISKSN---- |

<---Alt----->

<-----orexin----->

|         |                          |                   |                                |                                        |                                 |                          |                |                   |       |
|---------|--------------------------|-------------------|--------------------------------|----------------------------------------|---------------------------------|--------------------------|----------------|-------------------|-------|
|         | 80                       | *                 | 100                            | *                                      | 120                             | *                        | 140            | *                 |       |
| AT_Rpro | -----                    | DL                | -IPADWMAEELSSNPELAREFI         | I                                      | RRFIDVDQDGLVSPVEILLRNTVCQEPN    | ~~~                      |                |                   |       |
| AT_Hvit | -----                    | TSQFTDR           | -----                          | DS                                     | -FPADWFASEVQNNGELARLVVHKFIDTNQD | GELSADELLRPLYGPPTTTYK    |                |                   |       |
| AT_Apis | -----                    | LDLFVDNKEDSFNQNI  | PMEVSLEKILKNKY                 | --                                     | KHFIEKLI                        | DVNH                     | DGYISGEILL     | SIDGES~~~~~       |       |
| AT_Bmor | NFWVMSEPSPEREVQEVDEKTFES | -I                | PLDWFVNEMLNNPDEAREFVVEKFIDLNQD | GMLSSEELRN                             | V                               | ~~~~~                    |                |                   |       |
| AT_Lsta | LDQLESSTGLMEEISDG        | ----              | SL                             | -MTVNEFSQLLTSHPNLARALVKKFVDINGDDVISTDE | ELFRPILK                        | ~~~~~                    |                |                   |       |
| AT_Acal | LAR--DVL                 | LDNLRAEEEEKELEWSI | -MSVDE                         | ELASLLQSHPKLARALVKKFVDINGDNLVTA        | EELFRP                          | PTRK                     | ~~~~~          |                   |       |
| AT_Lgig | -----                    | FQD               | GGS                            | ---DV                                  | -LSVEDMAELVAENPSLAKALLRK        | FVD                      | TDNDGIISTTELLG | TKQMLK~~~~~       |       |
| AT_Ctel | -----                    | GDFNS             | LIDGESD                        | ---MV                                  | -MSDEDL                         | TEIIRADARLAQTFVKRFIDTDGD | GEVSRQELFEA    | ~~~~~             |       |
| Ox_Skow | -----                    | ELSTY             | QRPVSDAKT                      | ---NV                                  | -VTSDDIVNLI                     | RSSPSLIRKIVKA            | -IDL           | NGDDMISKAELQSLVYD | ~~~~~ |

<-----cryptic peptide----->



# 13. Alignment of ambulacrarian and amphioxus NPS-like precursors (family 10 - deuterostomian)

```

      *           20           *           40           *           60           *
NPS_Bflo MMQTPIFLCSVVLVGAVCGQLSETNFPQNGNRRLSPERSATVLRQFLHLEGAVGSPVSPSDGRALETGD
NPS_Spur MGYERRILRTLILLSILIVLASFVTVYGERDSNFMQOKQFRNIVPSPLIQKWRENRMGPAAEKTSENEQWRDE
NPS_Skow MLRKINAVVFFLVAICTLSRATFGEDGMTEKQVLLKLHKYWPKEDISEIGSSSTS GDSGENEAVKMGFWAV
<--- Signal peptide --->

```

```

      80           *           100          *           120          *           140
NPS_Bflo KRSFRNGVGKRRDSEERLPQNRGATELKAEATIFSQNGDPHDEGAKAASEKRSFRNGVGKRRTHFRIVAD
NPS_Spur LLSNLRNVLVRKHNASPSSRSRDRDITAYGLQEPMQQLPADVTADQLFILEGAVNSPRENYEEETPIDED
NPS_Skow DGKRNNGFWNGKRNNGFWNGKRNFDLLRIFGTNKKHSSINNQKRNNGFWNGKRNFDLDFEIPKKEQPHWRDEK
      NPS-like                                NPS-like

```

```

      *           160          *           180          *           200          *
NPS_Bflo ASLGGLDEPEALRQTGGDANSPSLSRDLWAEVQKDDDEQ-----
NPS_Spur KRNGFFFKRNNGFFFKRRSDSDASSTKMDDRLPKYESSGSFDK-----
NPS_Skow KNGFWNDGKRNFDNFKTDLLQYPSIEDKRNNGFWNGKRNFMMSMNNKASASTESEKRNNGFYMGKRSVDNTM
      NPS-like                                NPS-like

```

```

      220          *           240          *           260          *           280
NPS_Bflo -----CPACGSDGSEVCVILKGVCCRLDSCG-VLRKDVCSLIPDRALCASLQYSATCRITD GKC
NPS_Spur -----CRPCGPGROGR CVMVGTCCSPLFGCYLFTPEAAACMTED-VSPCQLNAPS CGLAGKC
NPS_Skow NISSYHYKESAKKCTTCGPGGKGC CVMYGVCCSLEIGCSMLTKE TEECTTISPLVGE CGRSDVQCGNFFRC
<-----Neurophysin-like----->

```

```

      *           300
NPS_Bflo VAPGVCCRAADHSCFLDPECD-----
NPS_Spur VADGICCSAAEGACHLDPTCTSMSLN
NPS_Skow VANGVCCTKETQSCKIDQECNVRW~~
      ----->

```

also refer to:

Rowe ML, Elphick MR. (2012). "The neuropeptide transcriptome of a model echinoderm, the sea urchin *Strongylocentrotus purpuratus*." *Gen Comp Endocrinol*.179(3):331-44.

## 14. Alignment of protostomian CCAP-like peptides (family 10 - protostomian)

\*

|             |   |   |   |   |   |   |   |   |   |   |   |   |   |   |   |
|-------------|---|---|---|---|---|---|---|---|---|---|---|---|---|---|---|
| CCAP_Ctel   | I | F | C | N | - | F | D | G | C | Y | N | ~ | ~ | ~ | ~ |
| CCAP_1_Lgig | V | F | C | N | G | F | T | G | C | G | G | R | H | R | G |
| CCAP_2_Lgig | P | F | C | N | N | W | - | G | C | G | N | G | ~ | ~ | ~ |
| CCAP_3_Lgig | L | F | C | N | N | Y | G | G | C | R | G | G | ~ | ~ | ~ |
| CCAP_1_Cgig | V | F | C | N | G | F | F | G | C | S | N | G | ~ | ~ | ~ |
| CCAP_2_Cgig | L | F | C | N | - | T | G | G | C | F | G | ~ | ~ | ~ | ~ |
| CCAP_1_Acal | V | F | C | N | G | F | T | G | C | G | G | R | F | R | G |
| CCAP_2_Acal | P | F | C | N | T | L | - | G | C | Y | N | G | G | ~ | ~ |
| CCAP_1_Ipar | V | F | C | N | S | F | G | G | C | R | S | L | ~ | ~ | ~ |
| CCAP_2_Ipar | V | F | C | N | S | Y | G | G | C | K | S | F | ~ | ~ | ~ |
| CCAP_Dpul   | P | F | C | N | A | F | A | G | C | G | ~ | ~ | ~ | ~ | ~ |
| CCAP_Dmel   | P | F | C | N | A | F | T | G | C | G | ~ | ~ | ~ | ~ | ~ |



15. Alignment of deuterostomian NPS-like peptides with protostomian CCAP-like peptides  
 (family 10 - bilaterian)

|           |           | *  | 20                |
|-----------|-----------|----|-------------------|
| NPS_Hsap  | ~SERNGV   | -G | TGMKKTSEFQRAKS    |
| NPS_Ggal  | ~SERNGV   | -G | SGIKKTSFERRAKS    |
| NPS_Skow  | NGEWN     | G  | ~::~::~::~::~::~  |
| NPS_Bflo  | ~SERNGV   | -G | ~::~::~::~::~::~  |
| CCAP_Lgig | ~PECNNW   | -G | CGNG~::~::~::~::~ |
| CCAP_Dpul | ~PECNAFAG | G  | CG~::~::~::~::~   |

## 16. Alignment of chordate NPFF-like peptides (family 11 - deuterostomian)

|             | *                     | 20             | *          |
|-------------|-----------------------|----------------|------------|
| NPVF_3_Hsap | ~~~~~                 | NMEVSLVRRVPNLP | QRF        |
| NPFF_3_Hsap | ~~~~~                 | SQFWSL         | ----AAPQRF |
| NPFF_2_Hsap | ~~~~~                 | SQAFL          | ----FQPQRF |
| NPFF_1_Mmus | ~~~~~                 | SPAFL          | ----FQPQRF |
| NPFF_2_Mmus | SAWGSWSKEQLNPQARQFWSL | ----           | AAPQRF     |
| NPFF_1_Olat | ~~~~~                 | ESVL           | ----HQPQRF |
| NPFF_1_Drer | ~~~~~                 | PSVL           | ----HQPQRF |
| NPFF_2_Olat | ~~~~~                 | DWEAAPGQIWSM   | ----AVPQRF |
| NPFF_2_Drer | ~~~~~                 | DWETVPGQIWSM   | ----AVPQRF |
| NPFF_Trub   | ~~~~~                 | EGAPGQVWSM     | ----AVPQRF |
| NPFF_2_Pmar | ~~~~~                 | AGPSSL         | ----FQPQRF |
| NPFF_3_Pmar | ~~~~~                 | SWGAPAEKFWMR   | ----AMPQRF |
| NPFF_1_Pmar | ~~~~~                 | LARAFMHFP      | QRF        |
| NPFF_4_Bflo | ~~~~~                 | GFSLDS         | ----DVPRRF |
| NPFF_3_Bflo | ~~~~~                 | SARFSVPF       | ----DIPRRF |
| NPFF_1_Bflo | ~~~~~                 | AAAASLF        | ----RPPNRF |
| NPFF_2_Bflo | ~~~~~                 | SPAVWL         | ----DSPNRF |

# 17. Alignment of protostomian SIF-amide-like peptides (family 11 - protostomian)

\*

|             |                   |
|-------------|-------------------|
| SIF_1_Lgig  | ~~~~~QVPVANPLLEFC |
| SIF_2_Lgig  | ~~~~GINPDMSSLEFC  |
| SIF_1_Hasi  | ~~NLNRLVGQQPLLEFC |
| SIF_2_Hasi  | ~~~~GVNPNMNSLEFC  |
| SIF_1_Cgig  | ~~GLTRLVGQQPLLEFC |
| SIF_2_Cgig  | ~~~~GMNPNMNSLEFC  |
| SIF_Ipar    | ~~~~GLNPNVNSLEFC  |
| SIF2_1_Lgig | ~QSARGNGRQRPLLEFC |
| SIF2_2_Lgig | ~~~HGVRPGMNGLVFC  |
| SIF_1_Ctel  | DPLEDHLPETSGLLEFC |
| SIF_2_Ctel  | ~~~~SSHPNMNNLEFC  |
| SIF_1_Apom  | DPLRDQLPDTTGLLEFC |
| SIF_2_Apom  | ~~~~GSHPNMNNLEFC  |
| SIF_1_Ecom  | EPLEDQLPEDTGLLEFC |
| SIF_2_Ecom  | ~~~TSHNPNMNNLVFC  |
| SIF_Tcas    | ~~~TYRKPPFNCSIIFC |
| SIF_Agam    | ~~~GYRKPPFNCSIIFC |
| SIF_Dmel    | ~~~AYRKPPFNCSIIFC |
| SIF_Dpul    | ~~~~TRKLPFNCSIIFC |
| SIF_1_Cele  | ~~~~~AIPFSGGMYG   |
| SIF_2_Cele  | ~~~~~STMPFSGGMYG  |
| SIF_3_Cele  | ~~~~~AAIPFSGGMYG  |
| SIF_4_Cele  | ~~~~~GAMPFSGGMYG  |
| SIF_1_Ppac  | ~~~~~GPVMFSGGMYG  |
| SIF_2_Ppac  | ~~~~~AAPSQFSGGMYG |
| SIF_3_Ppac  | ~~~~~AVPMTFSGGMYG |
| SIF_4_Ppac  | ~~~ASSPMMFGGMYG   |
| SIF_5_Ppac  | ~~~~~APMPYSGGMYG  |

## 18. Alignment of protostomian SIF-amide-like precursors (family 11 - protostomian)

```

                *           20           *           40           *           60           *
SIFa_Ctel      ~~~~~--MDCRLVTFVALFCSMLLVQQVLSDPLEDHLPETSGLEFFGKRSSHPN--MNNLLFGRRSYAQM
SIFa_1_Lgig    ~~~~~--MNRCTACLVLVLVILTVNAVQVSARGNGRQRPLFRHGVRPG--MNLVFR-----
SIFa_2_Lgig    ~~~~~--MVAKGTVGILIVLFNTICANIDLNYNQVPVANPLFRGINPD--MSSFRGKR-SGNS
SIFa_Cgig      ~~~-MKIYSIISIVIALVAVIVLKTSASKENSRGLTRLVGGQPLFRGMNPN--MNSFRGKR-AVDR
SIFa_Hasi      ~~~~~--MNCKIPCLLLVLTFCIMSFTHAQANPRNLNRLVGGQPLFRGVNPN--MNSFRGKR----A
SIFa_Ipar      MSGRNLLVPASLVLILSAILFFGHETQQVEAAYSPTRGQQNTHSFRGLNPN--VNSFRGKRGGSEQ
SIFa_Dpul      ~~~~~--MRSSEFIVVMVCVVVLTFWGQVAEATRKLFRFNGSFRSNQ-----GTD
SIFa_Tcas      ~~~~~--MQLALAKVFSVCIVVILTSWIEMTEATYRKPPFNGSFRGATIGKLIFRFLSKIIISSE
SIFa_Agam      ~~~~~--MAAFKVLGSLIVVLLVLLALSGHAEAGYRKPPFNGSFRNGN-----SVD
    <--- signal peptide --->   <- SIFa ->   <--- SIFa --->

```

```

                80           *           100           *
SIFa_Ctel      AANYQVEEARQGICKSMKETCGKWGFDVEN~~~~~
SIFa_1_Lgig    -NSESEQEQQ--DCWSSLNLCLKVILNNGDMEEV~~~~~
SIFa_2_Lgig    DHRDLRKMKD--TCKAVLSSCKILFSDYEDDCTVRNKVQDGFGRFK-
SIFa_Cgig      PTLDDI-IVE--KCSRIMAACREYCAHERMGEDDI~~~~~
SIFa_Hasi      PSMNNDVCVRT--MCNAVLSACAAWCQADMTDN~~~~~
SIFa_Ipar      EALSNTCEMGR--KCLAAMSMCNMCYFETNTINES~~~~~
SIFa_Dpul      KLESCPSNCQL--LCDAAMNACSDCWLPCIGSK~~~~~
SIFa_Tcas      YDSASKACLSA--MCEIACSECACQTCWFCPSCQCEK~~~~~
SIFa_Agam      YEGNAKCVLST--MCEIACACECACQCSWCFTCQCECQK~~~~~
    <-----> conserved cysteines

```

# 19. Alignment of chordate Gastrin-Releasing peptide (GRP) precursors (family 12 - deuterostomian)

```

                *           20           *           40           *           60           *
NMB_Hsap      ~~~-MARRAGGARMFGSLLLFALLAAGVAPLSWDLPEPRSRASKIRVHSRGNLWATGHFMGKKSLEPSSP
NMB_Drer      ~~~-MADDGHCKYTLFLFALIMLFNVSLSTSLSLDLTELNRNKVSKIKVHPRGNLWATGHFMGKKSISNSQL
NMB2_Drer     MSSPSVSRFCCCGFLTLYLVLFYISKTSSVSLDLTELNRNKVAKIKVNPRGNLWATGHFMGKKSVVDSKH
GRP_Hsap      ~~~~~--MRGRELPLVLLALVLCCLAPRGRAVPLPAGGGTVLTKMYPRGNHWAVGHLMGKKSTGESSS
Bombesin_Bvar  ----MSAIPLNRIPLGLFLLIFSFISLSSCMFVEDPNNQGGLNLQQRLLGNQWAVGHLMGKKSLQDTDF
GRP_Bflo      ~~~~~~MKSGWYVAFVLFVAGLLAPSRA-----DKGQEHWQYGHWYGKRDPSDVNN
                <--- signal peptide --->                <---- GRP ---->

```

```

                80           *           100           *           120           *           140
NMB_Hsap      SPLGTAPHTSLRDQRLQLSHDLLGILLKAL-GVSLSRPAPQIQYRLLVQILQK~~~~~-----
NMB_Drer      QDSPFPVKPDRNIMGESGSSDLKELITQEMLKIALQAQLEDPKRTRDVYNQVIREIFKELANRM~~~~~
NMB2_Drer     LPTEDESTMTAVEAALNARQVEPEDVFQEMLRVALQTHLDTRHIRPNVPETAILMKILES YIQDNK~~~~~
GRP_Hsap      VSERGSLKQQLREYIRWEEAARNLLGLIEAKENRNHQPPQPKAL-GNQQPSWDSSEDSSNFKVDVGSKGKGS
Bombesin_Bvar  EEMESFAKRNVENMKAESERELRHAQLVVRNILEQYLKNMQN~~~~~-----
GRP_Bflo      AQIDDVLRSHPELQQLLNKLMELPRRPKASSQMYTKYDDDYPDGDVSDSTKRVLEEPGSPYWKRVNEHVD

```

```

                *           160           *           180
NMB_Hsap      -----
NMB_Drer      ~-----
NMB2_Drer     ~~-----
GRP_Hsap      QREG RNPQLNQQ~~~~~-----
Bombesin_Bvar  -----
GRP_Bflo      RDYTSIIQRSAKNPRVVQGHKVLKPKTNSFKRTIWDRFMARI F PAGED

```

## 20. Alignment of protostomian CCH-amide-like precursors (family 12 - protostomian)

|            | *                                             | 20                                     | *                                                 | 40             | *              | 60                       | *     |
|------------|-----------------------------------------------|----------------------------------------|---------------------------------------------------|----------------|----------------|--------------------------|-------|
| CCHa_Ctel  | ~                                             | MLSVRSVGVLVGIAVLFSLQSFVQAK             | C                                                 | GGSWAIHACAG    | GN             | KRSEGSAGARAPPALCRATR     |       |
| CCHa_Lgig  | -                                             | MEVRCTTLFAVTSLLYLTVSVSLVSGK            | C                                                 | SGRWAIHACFG    | GN             | KRSDPSLTDNTENSRQETLL     |       |
| CCHa_Acal  | -                                             | MELTFGSSFTVALLSCLYISLITCPVVTAK         | C                                                 | HGRWAIHACFG    | GN             | KRSDPNMSPSTDELPTLLR      |       |
| CCHa_Cgig  | -                                             | MRNPSSFVLFSATLCVYFTVQISSVSASK          | C                                                 | KGPWANHMC      | GN             | KRSDSWSPPVQEPENNRKDEL    |       |
| CCHa_Dpul  | -                                             | MHIFFYVIHVTAMLAIVSGNC                  | -                                                 | NKYGNAC        | FG             | AHGKRSDFKRTSAVDLSDQIWPV  |       |
| CCHa_Bmor  | -                                             | MAQICLAVSIAVLLMMSQGVSAKRGC             | -                                                 | SAFGHSC        | FG             | GHGKRSGEPAPMDMANQDMVRH   |       |
| CCHa_Tcas  | -                                             | MNCWSTQVLLAFVMAFVLAEEAKRGC             | -                                                 | ATFGHSC        | YG             | GMGKRRTENNNEELLQDVQSEENP |       |
| CCHa1_Amel | M                                             | KNNATSGLPLSVCASICALIILIFFTDNSYAKRGC    | -                                                 | SAFGHSC        | FG             | GHGKRFDPNIREKILQDDDTITN  |       |
| CCHa2_Amel | -                                             | MAITSVNSQSVTVLIRTWIFMIIFCFAGGVAGS      | C                                                 | LSYGHSC        | WG             | AHGKRNGGHNNGYLVP SKTINEQ |       |
| CCHa_Agam  | -                                             | MHQLSTICFTLVIVSVLVQSTNGKRGC            | -                                                 | AAFHAC         | YG             | GHGKRSGSSASTLYPDGLDPSMV  |       |
| CCHa1_Dmel | -                                             | MKSTISLLLVICTVVLAAQQSQAKKGC            | -                                                 | QAYGHVC        | YG             | GHGKRSLSPGSGSGTGVGGGMGE  |       |
| CCHa2_Dmel | -                                             | MWYSKCSWTLVVLVALFALVTGSC               | -                                                 | LEYGHSC        | WG             | AHGKRSGGKAVIDAKQHPLPNSY  |       |
|            |                                               | <--- signal peptide --->               |                                                   | <--- CCHa ---> |                |                          |       |
|            | 80                                            | *                                      | 100                                               | *              | 120            | *                        | 140   |
| CCHa_Ctel  | ARRSTEATLP                                    | AIHREFCRGT                             | SERPNN                                            | ~              | ~              | ~                        | ~     |
| CCHa_Lgig  | RQILLPQTYEYHKSNDALLQDDDINTYEKSHEESQRM         | DLRALNILLK                             | TLMMEQK                                           | V              | R              | TENS                     | VMA   |
| CCHa_Acal  | QLLVSDVQRLSRL                                 | LLREPEAPVEDADL                         | SPNPGFEPGHPNEQLMPRLAAQKPVD                        | ~              | ~              | ~                        | ~     |
| CCHa_Cgig  | GRTMLRN                                       | VLLKRLNTYPSMSSYYS                      | SDSQSFYPMGSD                                      | FTEEGDSMSRENE  | LRQLLKEQ       | ILRKEMAAL                | VGDDD |
| CCHa_Dpul  | AANWNPTRPDEPIQERRQMKPLPALQLESVLVYNDIP         | PSAEHSRYLNQEDYNN                       | ~                                                 | ~              | ~              | ~                        | ~     |
| CCHa_Bmor  | QLGQEETPPHPGYPHSSYNVLQPGDDIIP                 | IRDGGVYDHDAARDVMKYKLRNIFKH             | WMDNYRRSQNTNDE                                    |                |                |                          |       |
| CCHa_Tcas  | AFVFTGPRSENQOKLTPEQYDNISRVIRQWILSYRRAQEMRPDYN | ~                                      | ~                                                 | ~              | ~              | ~                        | ~     |
| CCHa1_Amel | REIEDLNSRNEFDVSEKKFGGQTEILSSQSRHQDSSRFNPFALS  | FIVRQWLTSHRLHQ                         | PDME                                              | L              | N              | NK                       | ~     |
| CCHa2_Amel | GVPYLTKDQFILSRLIGRPLVSNKYKGRWDR               | LFKIKASFPEHWNDELDTHLINNEPIRDQNNNENMNQN |                                                   |                |                |                          |       |
| CCHa_Agam  | GLEVLPI                                       | PYSKLALDKSRSMDS                        | SAPEGMRLTNVYGF                                    | VPAASTHRTET    | TRPGELKYAIYAML | RQLMDEAA                 | IN    |
| CCHa1_Dmel | AASGGQEPDYVRPNGLLPMMA                         | PNEQVPLEGDFNDY                         | PARQVLYKIMKSWFNRRPRPASRLGELDY                     | PLANS          | A              |                          |       |
| CCHa2_Dmel | GLDSVVEQLYN                                   | NNNNNNQNNQ                             | DDDDNDDSNRNTNANSANNIPLAAPAIISRRESEDRRIGGLKWAQLMRQ |                |                |                          |       |

# 21. Alignment of chordate galanin-like peptides (family 13 – deuterostomian)

|           |                        |    |   |    |   |    |   |   |   |   |   |   |   |   |   |                      |   |     |     |     |     |     |   |   |   |   |   |   |   |   |   |   |   |   |   |   |   |   |   |   |   |   |   |   |   |   |   |   |     |   |   |     |   |   |   |   |   |   |   |   |   |     |     |     |
|-----------|------------------------|----|---|----|---|----|---|---|---|---|---|---|---|---|---|----------------------|---|-----|-----|-----|-----|-----|---|---|---|---|---|---|---|---|---|---|---|---|---|---|---|---|---|---|---|---|---|---|---|---|---|---|-----|---|---|-----|---|---|---|---|---|---|---|---|---|-----|-----|-----|
|           | *                      | 20 | * | 40 | * | 60 | * |   |   |   |   |   |   |   |   |                      |   |     |     |     |     |     |   |   |   |   |   |   |   |   |   |   |   |   |   |   |   |   |   |   |   |   |   |   |   |   |   |   |     |   |   |     |   |   |   |   |   |   |   |   |   |     |     |     |
| Gal_Hsap  | M                      | A  | R | G  | S | A  | L | L | L | A | A | A | L | S | A | S                    | A | --- | --- | --- | --- | G   | L | W | S | P | A | K | E | K | R | G | W | T | L | N | S | A | G | Y | L | L | G | P | H | A | V | G | N   | H | R | S   | - | F | S | D | K | N | G | L | T | S   |     |     |
| GalP_Hsap | M                      | A  | P | P  | S | V  | P | L | V | L | L | V | L | L | L | S                    | L | A   | --- | --- | --- | --- | E | T | P | A | S | A | P | A | H | R | G | R | G | G | W | T | L | N | S | A | G | Y | L | L | G | P | --- | V | L | H   | L | P | Q | - | M | G | D | Q | D | G   | --- | --- |
| Gal_Cint  | M                      | N  | S | F  | G | R  | Y | T | F | S | L | A | V | V | L | Y                    | I | S   | I   | V   | L   | C   | A | E | N | S | E | A | A | T | A | K | R | P | F | R | G | Q | G | G | W | T | L | N | S | V | G | Y | N   | A | G | --- | L | G | A | L | R | K | L | F | E | --- | --- | --- |
|           | <-- signal peptide --> |    |   |    |   |    |   |   |   |   |   |   |   |   |   | <-- galanin-like --> |   |     |     |     |     |     |   |   |   |   |   |   |   |   |   |   |   |   |   |   |   |   |   |   |   |   |   |   |   |   |   |   |     |   |   |     |   |   |   |   |   |   |   |   |   |     |     |     |

|           |    |   |     |   |     |   |   |     |   |   |   |   |   |   |     |     |     |     |     |     |   |   |   |   |   |   |   |   |   |   |   |   |   |   |   |   |   |   |   |   |   |   |   |   |   |   |   |   |     |   |   |   |   |     |   |   |   |   |   |   |   |   |     |     |     |     |     |
|-----------|----|---|-----|---|-----|---|---|-----|---|---|---|---|---|---|-----|-----|-----|-----|-----|-----|---|---|---|---|---|---|---|---|---|---|---|---|---|---|---|---|---|---|---|---|---|---|---|---|---|---|---|---|-----|---|---|---|---|-----|---|---|---|---|---|---|---|---|-----|-----|-----|-----|-----|
|           | 80 | * | 100 | * | 120 | * |   |     |   |   |   |   |   |   |     |     |     |     |     |     |   |   |   |   |   |   |   |   |   |   |   |   |   |   |   |   |   |   |   |   |   |   |   |   |   |   |   |   |     |   |   |   |   |     |   |   |   |   |   |   |   |   |     |     |     |     |     |
| Gal_Hsap  | K  | R | E   | L | R   | P | E | --- | D | D | M | K | P | - | G   | S   | F   | D   | R   | S   | I | P | E | N | N | I | M | R | T | I | E | F | L | S | - | F | L | H | L | K | E | A | G | A | L | D | R | L | I   | D | L | P | A | A   | A | S | S | E | D | I | E | R | S   | --- | --- | --- | --- |
| GalP_Hsap | K  | R | E   | T | A   | L | E | I   | L | D | L | W | K | A | I   | D   | G   | L   | P   | Y   | S | H | P | P | Q | P | S | K | R | N | V | M | E | T | F | A | - | K | P | E | I | G | D | L | G | M | L | S | --- | M | K | I | P | --- | K | E | E | D | V | L | K | S | --- | --- | --- | --- |     |
| Gal_Cint  | K  | R | D   | G | S   | S | L | D   | V | E | S | M | P | L | --- | --- | --- | --- | --- | --- | D | N | E | E | M | E | N | L | A | K | D | F | A | L | F | L | E | V | K | E | S | G | L | L | G | P | R | M | L   | R | C | I | L | S   | R | N | D | Q | V | M | D | S | M   | S   | E   | M   |     |

also refer to:

Kawada, T et al. (2011). "Peptidomic analysis of the central nervous system of the protochordate, *Ciona intestinalis*: homologs and prototypes of vertebrate peptides and novel peptides." *Endocrinology* 152(6): 2416-27.

## 22. Alignment of protostomian Allatostatin-A/Buccalin peptides (family 13-protostomian)

\*

```

Buc_1_Acal    ~~~GMDSLAFAGGLG
Buc_2_Acal    ~~~~MDSFAFAPGLG
Buc_3_Acal    ~~~GLDRYGFVGGIG
Buc_4_Acal    ~~~GMDHFAFTGGIG
Buc_5_Acal    ~~~GLDAYSFTGALG
Buc_6_Acal    ~~~GMDDFAFSPGLG
Buc_7_Acal    ~~~RMDSEFMFGSRLG
Buc_8_Acal    ~~~GMDRFSEFSGHLG
Buc_9_Acal    ~~~KMDQFSEFGPGLG
Buc_10_Acal   ~~~GFDHYGFTGGIG
Buc_11_Acal   ~~~QLDPMLFSGRLG
Buc_1_Lgig    ~~~GMDKFGFAGGVC
Buc_2_Lgig    ~~~GLDKFGFTGQLG
Buc_3_Lgig    ~~~DMDSEGFAGQLG
Buc_4_Lgig    ~~~GLDQYGFETGQLG
Buc_5_Lgig    ~~~GLDQLGFETGQLG
Buc_6_Lgig    ~~~QMDIFGYRGQLG
Buc_1_Ctel    ~~~YSNPSMKFAGIG
Buc_2_Ctel    ~~~AMDPSMKFAGIG
Buc_3_Ctel    ~~~SMDPSMKFAGIG
Buc_4_Ctel    ~~~YSNPSMQFAGIG
Buc_5_Ctel    ~~~~STDRMMLAGIG
Buc_6_Ctel    ~~ISIDPGIKYFGLG
Buc_7_Ctel    ~~~SFDPTYSHIGIG
Asta_1_Dmel   ~~~~~~VERYAFGLG
Asta_2_Dmel   ~~~~~~LPVYNFGLG
Asta_3_Dmel   ~~~~~~SRPYSFGLG
Asta_4_Dmel   ~~~TTRPQPFNFGIG
Asta_5_Apis   ~~~~~~AHKQYGFGLG
Asta_6_Apis   ~~~~~~LYRQYEFGLG
Asta_7_Apis   ~~~~~~SASKQYGFGLG
Asta_8_Apis   ~~~~~~AALKQYEFGLG
Asta_9_Apis   ~~~~~~ASPTFYSFGLG
Asta_10_Apis  ~~~~~~ASPQYSFGLG
Asta_1_Dpul   TSRSYSINPYSFGLG
Asta_2_Dpul   ~~~~~~NPTKYNFGLG
Asta_3_Dpul   ~~~~~~PDRFGFGLG
Asta_4_Dpul   ~~~~~~LPVYNFGLG
Asta_1_Cele   ~~~MAAPKQMVFGFG
Asta_2_Cele   ~~~~~~YKPRSEAMGFG
Asta_3_Cele   ~~~~~~AAMRSENMGFG
Asta_1_Ppac   ~~~~~~SDPRMESAAGFG
Asta_2_Ppac   ~~~~~~GDPRMESAAGFG

```



## 23. Alignment of deuterostomian TRH precursors (family 14- deuterostomian)

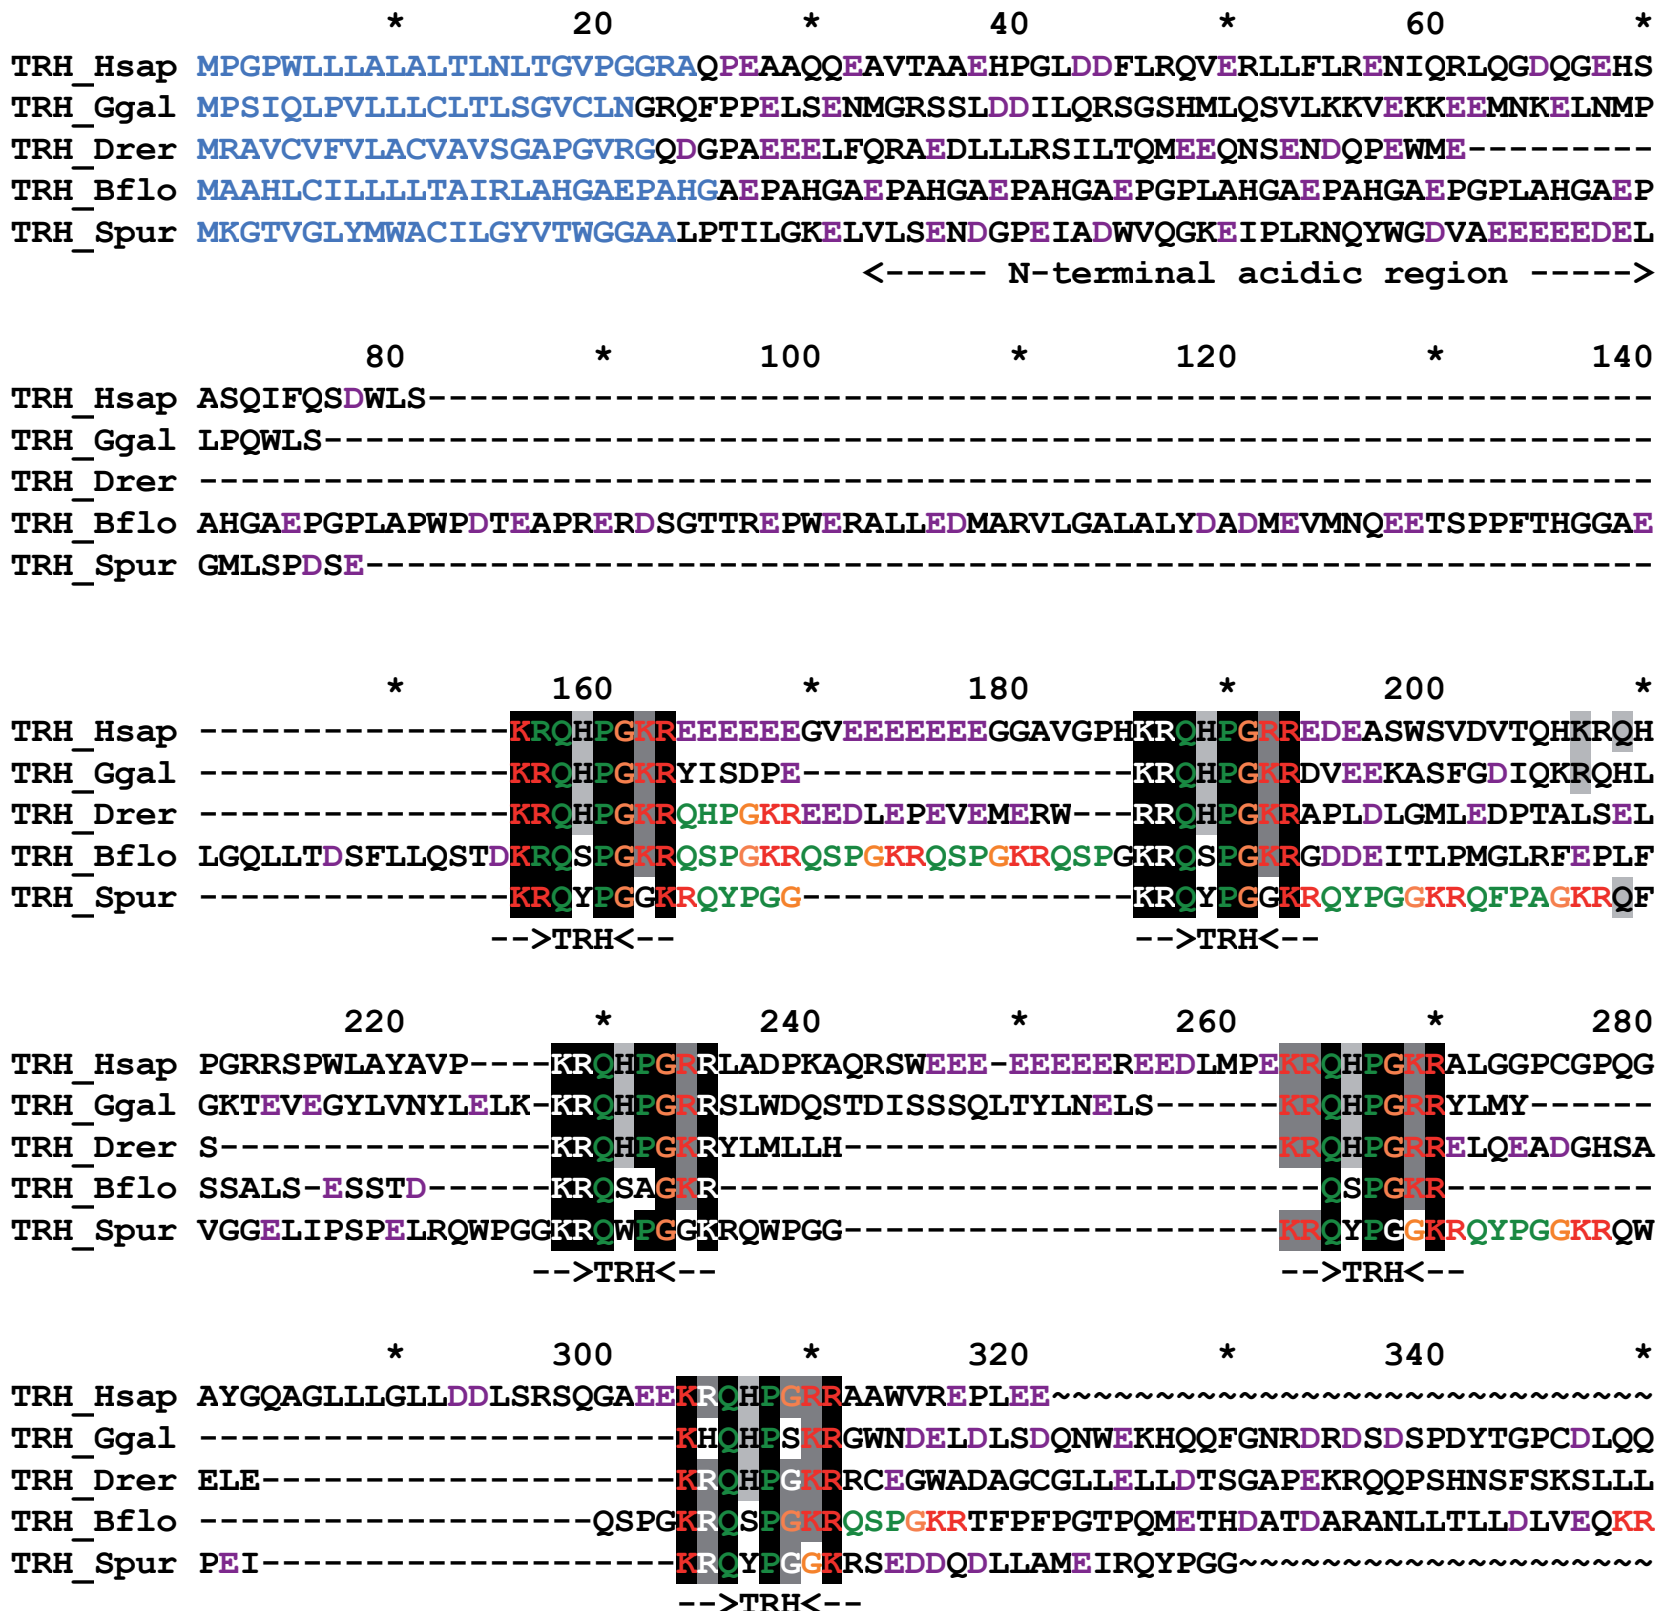

also refer to:

Rowe ML, Elphick MR. (2012). "The neuropeptide transcriptome of a model echinoderm, the sea urchin *Strongylocentrotus purpuratus*." *Gen Comp Endocrinol.*179(3):331-44.

## 24. Alignment of chordate Kiss1 precursors (family 15- deuterostomian)

```

                *           20           *           40           *           60           *
Kiss1_Hsap  MNSLVSWQLLFLCATHFGEPLEKVASVGNSRPTGQQLESLGLLAPGEQSLPCTERKPAATARLSRRGTSLSPPP
Kiss1_1_Drer MLLTVILMLSVARVHTNPSGHFQYLEDETPEETSLRVLRGTDTRPTDGSPSKLSALFSMGAGPQKNTWWWSP
Kiss1_2_Drer MNTRALILFMSAMVSQSTAMRAILTDMDTPEPMPDPKPRFLSMERR-----
Kiss1_Pmar  MTPACSLAALLAVCVFGGGAVAARTDRYGASPDSNHARRARSSEEIVTGDLRASPLRLFGAVCRHAAETPRLLRL
Kiss1_1_Bflo MRTTAFLLASLLVLLHTILPSTVDSLALGGREAQHRQDCGGRIRSRVPVGLKRAWPDRRGLNSDDIFWEDTLP
Kiss1_2_Bflo MSPHIPGKTMVALLLILAAVASESRFAHLKLPSFPGLQQTSGPYGPREPATPLRSFTQESRWQPWKPAGVVQTSE
Kiss1_3_Bflo MAVEAQMTSRAVVAVLLVSMATSHPAAAHHLVSWAVPAKIEAQPAPQYEDVADSNSLALEAHEPLLEALSPESQ
Kiss1_4_Bflo MMKRRLLVAVLLVACSMGCRGTQRDILLPHGAREDTAKSGDGRAVHDAVLLREVLTHGPTIEALVRSTMTTVLV
<-- Signal peptide -->

                80           *           100           *           120           *           140           *
Kiss1_Hsap  ESSGSPQQPGLSAPHSR-----
Kiss1_1_Drer ESPYTKR-----
Kiss1_2_Drer -----QFEEPSASDDASLCFFIQEKDETSQISCK
Kiss1_Pmar  RALRGGHDLDAGLTDGEALPRS-----
Kiss1_1_Bflo NSIERR-----QPSTEIDDEEVVDS
Kiss1_2_Bflo GSSAGFGLLHEWFRIGSKR-----SGGAWV
Kiss1_3_Bflo PRHPASQPDSYRPLLIRLPWPLARALSKR-----
Kiss1_4_Bflo ATGWYKMMHGKVPGLDGSRRGLQQGRRQGEEASTLHGILTSNIATTEQNSTSTARQTTEVSTSHTARSGWE

                160           *           180           *           200           *           220
Kiss1_Hsap  REKDLPNYNWNSFGLRFGKREAAPGNHGRSAGRGGAGAGQ-----
Kiss1_1_Drer -RQNVAYYNLNSFGLRYGKREQDMLTRLKQKSPVK-----
Kiss1_2_Drer HRLARSKEFNYNPEFGLRFGKRNEATTSDSRLKHKHLLPMMLYLRKQLETS-----
Kiss1_Pmar  AEQDVTEFNYNPEFGLRFGRRSGAQSSTAATRSRAEAACAPGKRGCRLVISKFKLRF-----
Kiss1_1_Bflo ADPDRVQYNPNAWS-RFGRSMCP-----
Kiss1_2_Bflo ADTNMDDISPNMFS-LHGKRNVS-----
Kiss1_3_Bflo ---ARKPPNMNAWGQPWGKRDLSLVN-----
Kiss1_4_Bflo YENEPPEYNPNSWS-VEGRMVSPQASPAPEQDDEPGVPGMPVLAEMPPKAAANLNMWSSFGRRSAADRIPERTR
<--Kiss1 peptide-->                                     <-- Kiss1-->

                *           240           *           260           *           280           *
Kiss1_Hsap  -----
Kiss1_1_Drer -----
Kiss1_2_Drer -----
Kiss1_Pmar  -----
Kiss1_1_Bflo -----
Kiss1_2_Bflo -----
Kiss1_3_Bflo -----
Kiss1_4_Bflo DGSPVRSSVNPAFFLTPFGDQTDKQRSIEERQVKQTGDAAASHKRTPDPRVYPPNARPTLQPDWTKIPFFG
<-- Kiss1 -->

```

## 25. Alignment of chordate Ox26/QRFP precursors (family 16 - deuterostomian)

```

                *           20           *           40           *           60           *           80
QRFP_Hsap  MVRPYPLIYFLFLPLGAC-----FPLDDRREPTDAMGGLGAGERWADLAMGPRPHSVWGSSRWLRASQPQALLVIARGL
QRFP_Trub  MTTAFHLGASHLLFFTLCPIPRSIMPSPHFPSILLPFEDLSELQQHQQDHCLLQQVTRAGSGDQPHVTLLQPKQSRLRR
QRFP1_Bf1o MSRILAVLLAVLATTAAT-----ANLPSPHRLVRRSAPSEDEVRMQRRANLLALLEDDDDNETREPSEAQGAGLSKEEA
QRFP2_Bf1o MSRMLAVLLAVLVTTAATTNPSPHRLARRSAPSEDEVRLQRRANLMALLEDDDDNGASEATDTPVPGLSLTEEEADALVKC
QRFP3_Bf1o MGVRVMRSRICVIGLLVLMLTQSEA-----YSFREKSWRTSPYYRQYGGYFRRRRDGGDQAPSFTS
<--- signal peptide --->

```

```

                *           100           *           120           *           140           *
QRFP_Hsap  QTSGREHAGCRFRFRGRQDEGSEATGFLPAAGEKTSGPLNLAEELNGYSRKKGGFSSRFGRR~~~~~
QRFP_Trub  AQRDALATRILTPLTGGPSVSFRERRQGENGGKKNEALTSIAGEIQAVSREKGGFGFRFGKRRWTDWRRKSLRQN~
QRFP1_Bf1o EALVKYLQEPVGGLRRPAINVYRPDVEEVEREKKTRLLSWAAEMLRMMSTKGGFGQFRFGKREAAEGKER~~~~~
QRFP2_Bf1o LVDPVGGLRGPLHTGGGFHRPRSGRGERGDREKKALDLSSLAQSLRTMGSRKAGIILRFGGKRDEDEGENTSLAANI
QRFP3_Bf1o TGNGEDVSNGLDDDAGIYLSDQAGDDGISPADKRSAMLQQLAQQLKNRPREKGGFTFRFGKRESRRSFGSD~----
<----- Ox26/QRFP peptide ----->

```

# 26. Alignment of chordate Parathyroid hormone (PTH) peptides (family 17 - bilaterian)

|             |          | * |                | 20            |              | *        |     | 40 |  |
|-------------|----------|---|----------------|---------------|--------------|----------|-----|----|--|
| PTH_Hsap    | ~~SVSEIQ | L | MHNLGKHLNSMER  | VEWLRKKLQDV   | -----        | HNF      | ~~  |    |  |
| PTHrP1_Hsap | ~~AVSEHQ | L | LHDKGKSIQDLRRR | FFLHHLIAEI    | -----        | HTAEI    |     |    |  |
| PTH1_Drer   | ~~SVTHAQ | L | MHDKGRTLQDFKRR | MWLQELLHEV    | -----        | HTAEI    |     |    |  |
| PTH2_Drer   | ~~SVGHAQ | M | HDRSRSLHDRKRR  | MWLQDLLQV     | -----        | HTAQV    |     |    |  |
| PTH3_Drer   | ~~SISEVQ | L | MHNVREHKEMLD   | RQDWLQLKLNNI  | -----        | IIPSV    |     |    |  |
| PTH4_Drer   | ~~AVNEVQ | L | MHNLGVHKKHVEL  | RQDWLQMKLRGI  | -----        | HTASV    |     |    |  |
| TIP39_Hsap  | SLALADDA | A | FRERARLLAALERR | HWLNSYMHKI    | -----        | LVL      |     |    |  |
| TIP39_Drer  | NIVVADDA | A | FREKSKLLTAMER  | QKWLNSYMQKI   | -----        | LVV      |     |    |  |
| PTH_Cint    | ~QSNADLN | L | QNKKTRHMNELIR  | QYYISSILNEI   | -----        | KG       | ~~~ |    |  |
| PTH1_1_Bflo | ~~SITDVT | M | TEERTRDMISRAR  | QAWLTALVDEI   | -----        | LLPEGANS |     |    |  |
| PTH1_3_Bflo | ~~QITDR  | T | MTEERSRDLVDR   | ARQAWISSLVDEI | -----        | VEASGTS  |     |    |  |
| PTH1_4_Bflo | ~~QITD   | V | DTSDHSKAFTDR   | ERTAWLHRLNAV  | -----        | QGQ      | ~~  |    |  |
| PTH2_Bflo   | ~TGLTDV  | T | LLNERHGDLNER   | ARVAWLRFLGGID | PDASEALASEED |          |     |    |  |

# 27. Alignment of chordate (Glucagon+PACAP)-like peptides (family 17 - bilaterian)

|              | *                                    | 20 | * |
|--------------|--------------------------------------|----|---|
| Hsap_GIP     | ~YAEGTFTISDYSIAMDKIHQQDFVNW~~~~~     |    |   |
| Hsap_PACAP   | ~HSDGIFTDSYSRYRKQMAVKKYLAAVLG~~~~~   |    |   |
| Hsap_VIP     | ~HSDAVFTDNYTRLRKQMAVKKYIENSILNG~~~~~ |    |   |
| Hsap_PHM     | ~HADGVFTSDFSKLIGQLSAKKYTESLMG~~~~~   |    |   |
| Hsap_sec     | ~HSDGTFTESELSRLREGARLQRLIQG~~~~~     |    |   |
| Hsap_GLP1    | ~HAEGTFTSDVSSYLEGQAAKEFLAWLVKGRG~~~  |    |   |
| Hsap_Gluc    | ~HSQGTFTSDYSKYLDSTRRAQDFVQWLMNT~~~~~ |    |   |
| Hsap_GLP2    | ~HADGSFSDEMNTILDNLAARDFLNWLIQTKITD   |    |   |
| Cint         | ~YAESAFTSMAAKQMDHAAFQQLIRG~~~~~      |    |   |
| Csav         | ~YVENAFTSYTAKQLDRAAYQHLLIRG~~~~~     |    |   |
| Bflo_95424   | QLGDQGVTSALAAARLEQAEARQYIKDLLAQAVG~  |    |   |
| Bflo_96553   | QLGDQGVTSALAAARLEQAEARQYIKDLLAQAVG~  |    |   |
| Bflo_95424_2 | ALGDQGFTSDLASKLSEAEARRMIQTLMAQAIG~   |    |   |
| Bflo_96553_2 | ALGDQGFTSDLASKLSEAEARRMIQTLMAQAIG~   |    |   |
| Bflo_96553_3 | QLGDQSITSEMSVRLREAEARRLIQSLMAKQG~~~  |    |   |

## 28. Alignment of protostomian Leucokinin peptides (family 18 - protostomian)

```
Lk_1_Ctel ~AFSAWGE
Lk_2_Ctel ~GFHAWGE
Lk_3_Ctel ~AFNPWGE
Lk_4_Ctel ~QFGPWGE
Lk_5_Ctel ~AFNPWGE
Lk_6_Ctel ~SFNPWGE
Lk_1_Lgig AAFAAWGE
Lk_2_Lgig APFSVWNG
Lk_3_Lgig AAFTSWGE
Lk_4_Lgig ~AFTSWGE
Lk_5_Lgig PAFSSWNG
Lk_6_Lgig ~SFSAWKE
Lk_1_Acal AGFAPWAG
Lk_2_Acal PAFHAWSE
Lk_1_Ipar ~KFSPWAG
Lk_2_Ipar SRFSPWHG
Lk_3_Ipar ~GFNPWAG
Lk_1_Llon IKFHSWGE
Lk_2_Llon TPFHSWGE
Lk_Dmel QRFHSWGE
Lk_Cele KQFYAWAG
Lk_1_Xind ~KFYAWAG
Lk_2_Xind ~RFYAWAG
Lk_3_Xind ~KFYQWAG
Lk_Tspi ~KFYPWAG
```

## 29. Alignment of protostomian Ecdysis-Triggering Hormone (ETH) peptides (family 19 - protostomian)

|                | *       | 20                   |
|----------------|---------|----------------------|
| Pleurin_Ctel   | ~~~~~IF | YTN SKENDY PRLG      |
| Pleurin_Apom   | ~~~~~FY | AQNEGNDF PRIG        |
| Pleurin_1_Lgig | ~~~~~VF | YTSSKANDY PRIG       |
| Pleurin_2_Lgig | ~~~~~FF | TSSKENTY PRMG        |
| Pleurin_3_Lgig | ~~~~~FT | AGDSASY PRLG         |
| Pleurin_4_Lgig | ~~~~~AG | YFTKGAASY PRLG       |
| Pleurin_Vdec   | ~~~~~FW | TNSKDSDY PRIG        |
| ETH_Dpul       | ~~~~~GS | LSNFFLKASKAV PRLG    |
| ETH_1_Tcas     | ~~~~~EN | YVLKAAKNV PRIG       |
| ETH_2_Tcas     | ~~~~~FF | MKASKSV PRIG         |
| ETH_Apis       | ~~~~~GF | AGEEFFLKASKSV PRIG   |
| ETH_Nvit       | ~~~~~DE | PPAFFLKIAKNI PRIG    |
| ETH_Amel       | ~~~~~DE | VPAFFLKIAKNI PRVG    |
| ETH_1_Bmor     | ~~~~~GL | DGSFIK-PNNV PRVG     |
| ETH_2_Bmor     | SNEAF   | DEDVMGYVIKSNKNI PRMG |
| ETH_Lmig       | ~~~~~SD | FFLKTAKSV PRIG       |
| ETH_1_Dmel     | ~~~~~DD | SSPGFFLKITKNV PRLG   |
| ETH_2_Dmel     | ~~~~~GE | NEFAIKNLKTI PRIG     |

30. Alignment of lophotrochozoan luqin and arthropod RYamide peptides (family 20 - protostomian)

```

                *           20           *           40           *           60           *
Lq_Lgig      MKLSEMIMCIMAVLLVTITLGNG-----
Lq_Lstag     MISTCCVLSVIFSLCYA-----
Lq_Apom      MATFRAIVMGLASLILSLLILTQPSEQ-----
lq_Iobs      MMELMLVACVLVVMTSLLQPTAA-----TPSWKPGQRFGRGGPS--
RYa_Dpul     MARKESVFWLFC TLALMMSVVLVDA--QTFFTNGRYGKRSEVRSRVASRSADERFFGGPRFGRSGNGGIV
RYa_Tcas     MHARKLIVVLVYILTVLVSVAVS-----KRYTSEKRVQNLATFKTMMRYGRGGPSPNN
RYa_Dpon     MLVRKVPVIFVFLVSIFITVNA-----DMESIKRIPSHSFKQMMRYGRSSANN--
RYa_Isca     MLHCRAWAVALIALLVLSVASA-----
Luqin_Tspi   MDLKIKIRIIFFLIGMALFSEA-----
Luqin_Cele   MLTRVPVLILAVIVMLALC-----QEPE
<-- Signal peptide -->
    
```

```

                80           *           100           *           120           *           140
Lq_Lgig      -----APQWRPQGRFGKRVNPTLSLLLHGDQEKQFLNHEKPFISEDKPYIPEVTDEISVERLTS
Lq_Lstag     -----TPHWRPQGRFGKRTTEDDNPVDFGISRPQDIPIELMF'SKNELSRNSKPRL-----
Lq_Apom      -----QYAWRPQGRFGKRDNYLARGILSGPSLDTSNKIKMLSTHMFESNGVL-----
lq_Iobs      --DYLGIQKKPHGWRPQGRFGKRSLASSSSPSSSSFEQSIDAELLKSAAVSGAIEVPVELLSTGENGM--
RYa_Dpul     LGNSELDARNPERFFIGSRYGKRSEMEQIVPSPQVDESTSNSQEKETFLE-----
RYa_Tcas     KENKVNIRPRADAFFLGPRYGKRSGWSPNASLVYPVSTPLCGLDED-----
RYa_Dpon     --EKINVNPRADLFYLGRYGKRAGPTLAKLDTVYDSTF-----
RYa_Isca     -----AKGTPQFVPNGRYGRRSVTPPLAGVSKDITVNFEGDST-----
Luqin_Tspi   ----KPASLARYGRAALPRYGKRAELISGLDAMRDEVTEFKNSP-----
Luqin_Cele   KPEKRPALLSRYGRAVLPRYGKRSGNLMESSQNSLTEESSDVV-----
<--Luqin/NepY-->
    
```

```

                *           160           *           180           *           200           *
Lq_Lgig      ARDNLKFLHRLCSESGLENVPRCSWSRKTSESSDP-----
Lq_Lstag     -----CSTSGVAGYPPCDAQVNAMQVATLG-----
Lq_Apom      -----CVSAGSRGLRYCFTV-----NPVPGSSSPVSMANTPFIEVGDVLCVSVAEIGAYRCFQ
lq_Iobs      ----FLRLGVKPCSITGMDGIPPC-----TGASEGASETF~
RYa_Dpul     -----CNPIGIEQLYHC-----IERLKSAAHFDLMQHQQV~
RYa_Tcas     -----LSCAYTGISDLYRC-----TPRKGESEEFTSSN~
RYa_Dpon     -----MPCTYTGVADLYRC-----DTSRSTMREDRRK~
RYa_Isca     -----ISCHTHGFADIYRC-----TRKTSDDYKDSSFE~
Luqin_Tspi   -----CVYTGYEDLYRCSSMT~
Luqin_Cele   -----CQL--IDGKYICLPVDAGFLGEVNGSIKQNSKTKCPAFFKNVSFSLFFRAFYLTVPAC
<- Conserved Cys ->
    
```



## 31. Alignment of protostomian Allatostatin B peptides (family 21 - protostomian)

\*

```

AstB_Ipar      ~~NGDTWDSM--SAWG
AstB1_1_Ctel  ~~~~~GWKNNNMRVWG
AstB1_2_Ctel  ~~~~~KWGSNSMRVWG
AstB1_3_Ctel  ~~~~~WGGNDRVWG
AstB1_4_Ctel  ~~~~~SWKTNVMRVWG
AstB1_5_Ctel  ~~~~~GWADNNMRVWG
AstB1_6_Ctel  ~~~~~AWVGDKSLSWG
AstB2_1_Ctel  ~~~~~KWSNNMGMWG
AstB2_2_Ctel  ~~~~~AWSSNKMMWG
AstB2_3_Ctel  ~~~~~EWASNYMGMWG
AstB2_4_Ctel  ~~~~SKWGSKMMMWG
AstB_1_Lgig   ~~~~~AWKSSYLNTWG
AstB_2_Lgig   ~~~~~~WTNSGLITWG
AstB_3_Lgig   ~~~~~KWNQF--ITWG
AstB_4_Lgig   ~ASDKGWNGF--TTWG
AstB_5_Lgig   ~~ANKDWSSL--STWG
AstB_6_Lgig   ~GQNKDWSSL--TTWG
AstB_7_Lgig   ~GHDRDWSL--TTWG
AstB_8_Lgig   ~ARENDWSAL--STWG
AstB_9_Lgig   ~ANNKDWASL--TTWG
AstB_10_Lgig  ~ANDRDWSL--TTWG
AstB_11_Lgig  ~AKGNNWSGL--TTWG
AstB_12_Lgig  ~~ANKDWSL--TTWG
AstB_13_Lgig  ~~ANKDWSGL--TTWG
AstB_14_Lgig  ~~GNKDWSGL--TTWG
AstB_1_Apis   ~~~~~AWRDLQTAGWG
AstB_2_Apis   ~~~~~GWQNLK-TTWG
AstB_3_Apis   ~~~AQDWQNLH-SSWG
AstB_4_Apis   ~~~~QGQQLH-GGWG
AstB_5_Apis   ~~~~~GWKDMQSGGWG
AstB_6_Apis   ~~~~~SWDNFQ-GSWG
AstB_7_Apis   ~~~AADWTSFR-GSWG
AstB_1_Hvir   ~~~~~GWNDMS-SAWG
AstB_2_Hvir   ~~~~~AWQDLN-SAWG
AstB_3_Hvir   ~~~~~AWRDMSQSPWG
AstB_4_Hvir   ~~~~~GWQDMS-SAWG
AstB_5_Hvir   ~~GPEKWANFH-GSWG
AstB_1_Tcas   ~~~~~DWNKDL-HIWG
AstB_2_Tcas   ~~~~~GWNNLH-EGWG
AstB_3_Tcas   ~~~~~AWQSLQ-SGWG
AstB_4_Tcas   ~~~~~NWGQFH-GGWG
AstB_5_Tcas   ~~~~SKWDFR-GSWG
AstB_6_Tcas   ~~~EPAWSNLK-GIWG
AstB_1_Cele   DDRVLGWNKAH-GLWG
AstB_2_Cele   ~~TPQNWKNLN-SLWG
AstB_3_Cele   ~~SPAQWQRAN-GLWG
AstB_Ppac     QEEPRGWNKAY-GLWG

```

## 32. Alignment of protostomian proctolin precursors (family 21 - protostomian)

```

          *          20          *          40          *          60          *          80
Prct_Dmel MGVPRSHGTGIGCGSGHRWLLVWMTVLLLVPVPHLVDG-----RYLPTRSHGDDLDKI-REIMLQILELSN
Prct_Tcas MFDRKLVFALVFVVFATLAVEG-----RYLPTRSNGDRIEKI-REILKDIFFENEV
Prct_Apis MAGKFSALFLVGFVAADVVPYMAEA-----RYLPTRGNDRLTRI-KELITDILLDSGA
Prct_Dpul MLKSTSLKALVTLVVSFVLMASSPRAADA-----RYLMTRGKDPREFRI-YDIITKILLQNGG
Prct_Ctel MEIRLTLVLALLVAALGVVANALSIPSDALKDNQMDVADKGDQS---RRATWLETRDLEDDFKELVYLTIEELVNEGR
Prct_Apom MDMCRLSAILVILYGTLCAVTNAMSIPASQLKDSGVELDSSENTALDEGRRASWLETRDLENDFKDIVFLTIQETAQEGR
Prct_Lgig MRSSTILSLLVLLLAAPTFCCLPPDQGSEIDDL-----KRPKYMDTREELSVLKDMVYIVLQELAEDGK
Prct_Acal MELQACNIFALFVVVVTLSVASSLPASRTDDVLQEASGLALN-----KRPKYMDTRRDLDVFKDIVLISIQEIVDENR
<--- signal peptide --->          <-----> <-----...----->
                                proctolin  conserved domain

          *          100          *          120          *          140          *
Prct_Dmel EDPQQQQ-QQQQQQQH--PQLRLHNEATGGSSSSSNINNPRVSNNGNSNAAWLQKLSAMGALDELGGDGAREFGPNYGRY
Prct_Tcas EKEEYQADAPPRWHPESKLFYKREAPAH~::~::~::~::~::~::~::~::~::~::~::~::~::~::~::~::~::~
Prct_Apis QPNLEMERPYVDVNGDFSRLRPREYNIPEKSIMELFNPTVPHHQRPRES~::~::~::~::~::~::~::~::~::~::~::~
Prct_Dpul GDLEYQIKSQLDSGP~::~::~::~::~::~::~::~::~::~::~::~::~::~::~::~::~::~
Prct_Ctel MDPRVLS-KEENEVKE--KRGRWQGFCFKRTRSGRFLPYICWKGDGRK~::~::~::~::~::~::~::~::~::~::~::~
Prct_Apom IDPRVIVEENSLDTKE--KRGRWQGFCFRRTKTGRFLPYICWKGDGRK~::~::~::~::~::~::~::~::~::~::~::~
Prct_Lgig INPELFT-IHDQKAVV--KRMKYMIGICMRRTKYNAVVPYPCLRSGR~::~::~::~::~::~::~::~::~::~::~::~
Prct_Acal LNPALLPEEDAPKPVE--KRMRYMIGICMKK-QYNNFIPFPCLRSGR~::~::~::~::~::~::~::~::~::~::~::~
>

```

also refer to:  
 Veenstra, JA. (2010). "Neurohormones and neuropeptides encoded by the genome of *Lottia gigantea*, with reference to other mollusks and insects."  
 Gen Comp Endocrinol.167(1):86-103.

### 33. Alignment of protostomian Pigment-Dispersing Factor (PDF) precursors (family 22 - bilaterian)

```

                *           20           *           40           *           60           *
PDF_Dmel  MARYTYLVALVLLAICCGWGYCGA--MAMPDEERYVVRKEYNRDLLDFNNGVGVGQFSPGQVATLCRYPLI
PDF_Pmon  MCRVAMLLVVLAVTAVVVTEA-----QREPAASKCQAATELAIQIILQAV
PDF_Psed  MNSIIIVLSLAVLAIFTSSIQS-----SPLNRAEDLQPVERQIIAEMASK
PDF_Hduj  MDVKAFLFAVAMSTFLTSSSA-----IWVFLEPRFDAEFISRNSEMVGVQEVYSQFSPGSEGPAQLLSQG
PDF_Cele  MNRFIISMIALLAVFCAVSTA-----SPLLYRAPQYQMYDDVQFVKRSNAELINGL
Cere_Ctel MRNSIMLNLTVVVCIISLTVFQVCA-----RPYDTQLSEKDRQEIMHYAASILK
Cere_Lgig MVALSPEMNSCTKCLLLLTVFGLTVLVKLSSES-----SPLRPYQTQIEEKSRQDIITLAARVIK
PDF_Skow  MASYKSMMVIYCVFLLVADIEG-----FLKVVAKKSGRIQREVAEKRDLLRD
<--- signal peptide --->

```

```

                80           *           100           *           120
PDF_Dmel  LENS LGPSVPIRKRN-SELINSLIISLP-KNMNDAGGR~-----
PDF_Pmon  KGAHPGVAVGPHKRN-SELINSLIIGLP-KFMIDAGGR-----
PDF_Psed  ILKVAEDGLVYSKRN-AELINSLIIGLP-KMMNDAGGR-----
PDF_Hduj  YQPVELTRIPIRKRN-SEILNTIIGLP-NKLRQRG-----
PDF_Cele  IGMDLGKLSAVGRSNAELINGLISMNLNKLSGAGGR-----
Cere_Ctel IAFGQGYLPTQEKRN-SGMLDAVINMP--DLFKAGRK-----
Cere_Lgig IAMYGSNQYDVIKRN-AGTVDHLLNFP---DLSVGR~-----
PDF_Skow  KEIEKRPHGERDLRN-YGNTKQEVDIP--RHMVLGR~-----
<--- PDF peptide --->

```

# 34. Alignment of chordate Neurotensin precursors - putative neurotensin-like peptides in Ciona

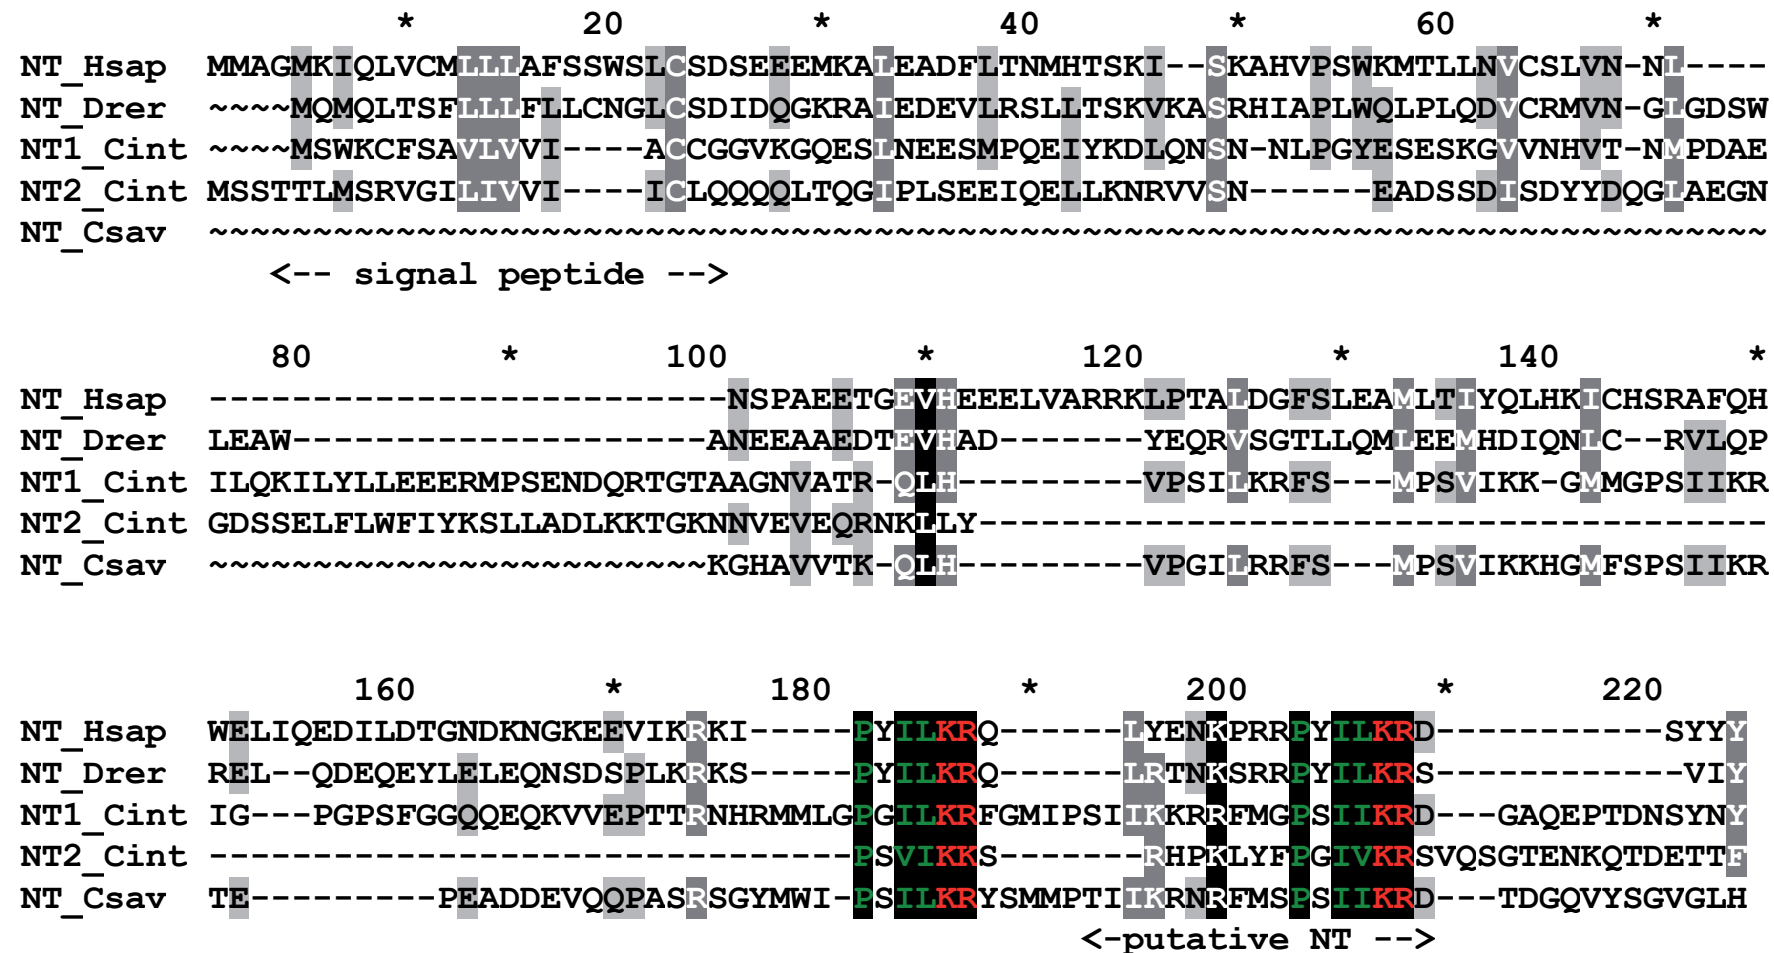

also refer to:  
 Kawada, T et al. (2011). "Peptidomic analysis of the central nervous system of the protochordate, Ciona intestinalis: homologs and prototypes of vertebrate peptides and novel peptides." Endocrinology 152(6): 2416-27.

# 35. Alignment of putative chordate Opioid precursors - putative opioid-like peptides in *Ciona*

\*
20
\*
40
\*
60
\*

PENK\_Hsap MA-RELTICTWLLLLGPGLLATVRAECSQDCATCSYRLVR-PADINFLACVMECEGKLPS-LKIWETCKE  
 PDYN\_Hsap MAWQGLVLAACILL-----MFPSTTADCLSRCSLCAVKTQDGPKPINPLICSLQCQAALLP-SEEWERCQS  
 Op-like\_Cint MK---LVKKFSILL-----AAIVVCYFGCIADAVP-VDTVE--KQ  
 Op-like\_Csav MY---SIQACILL-----LSILFNPDSIIVKAVPAIDAIE--RE

80
\*
100
\*
120
\*
140

PENK\_Hsap LIQ---LSKPELPQDGTSTIRENSKPE--ESHLL-----  
 PDYN\_Hsap FLS---FFTP-----STIGLNDKEDLGSKSVG-----  
 Op-like\_Cint LIQREGTGNPENFLDWINQINST--DDAEDNPEL-----AENR  
 Op-like\_Csav LISKQINKEEVNFIDFTKAINSTALDDMSDELWMLGOMIQPIQESTSVNDEEQLSGIDDIEEIDKEQG

\*
160
\*
180
\*
200
\*

PENK\_Hsap -----A-----KRYGGFMKRYG-----GFMKKMDE--LYPMEPE--EEAN  
 PDYN\_Hsap -----E-----GPYSELAKLSG-----SFLKELEKSKFLPSIST--KENT  
 Op-like\_Cint NSDEENNDYSPGQAESIQSD-----KRFQSLFKRYP-----GFQGLFKR--HNPHLPDFLKRYN  
 Op-like\_Csav TNDELNLGKGDQONQAYFSPQMKRHFGLFKRMRGLFKRAPNAPLKRGLSGLFRDPNTEGEPDARKVSD

220
\*
240
\*
260
\*
280

PENK\_Hsap GSEILAKRYGCFMKKDAE-----EDDSIANSDDLKELLETCDNRERSHHQDGSNDEEIVSKRY  
 PDYN\_Hsap LKSLEEKLRGLSDGFRE-----GAESEIMRDAQLNDGAMETG-----TLYLAEEDPKEQV-KRY  
 Op-like\_Cint S-----MGLFKRSPG-----MLGLFKRG-----LLGLEKRS  
 Op-like\_Csav GGRTDTRGMQGLFKREPAFPVDADNSYDGKSHQVKLDRRRMPGLFKRC-----LONLEKRA

\*
300
\*
320
\*
340
\*

PENK\_Hsap GGFMRGL-KRSPQLE-----DEA-----KEIQKRYGGEMRRVGRPEWMDYQKRYGGFLKR-FA  
 PDYN\_Hsap GGFIRKYPKRSSEVA-----GEGDGD SMGHEDLYKRYGGELRRI-RPKLKWDNQKRYGGELRRQFK  
 Op-like\_Cint DARLQGLFKRDSATQ--GSFKRSSEA-----QALPKRYPNEQ-----GLFKR-LS  
 Op-like\_Csav GG-ANSLFKREDGIENEVGARNRKS DL-----QEIFKR--GIQ-----GLFKR-MT

<-opioid?->

360
\*
380
\*
400
\*

PENK\_Hsap EA--LPSDEEGESYSKEVPEMEKRYGG-----EMRF  
 PDYN\_Hsap VV--TRSQEDPNAYS GELFDA~  
 Op-like\_Cint EATEYPEDDSSNDDTKQ RGNLHSLFKRDTS-----AHYLEDRGESIPFLFRRS  
 Op-like\_Csav -TDDLNAENNLGEAPHYRRSFHSLFKRDLSLSWKNKSSGENKNKVHSLFKRGENIPFIFKRN

### 36. Presence of a common C-terminal domain in vertebrate ghrelin and motilin precursors

```

                *           20           *           40           *           60           *
ghrelin_Drer  MPLRCRASSMFLILLCVSLSLCLESVSGGTSFLSPT----QKPQG-----RRPPRVGRREAAD----
ghrelin_Asch  MFLKRNTYLLVFLFC-SLTIWCKSTSAGSSFLSPS----QKPQNRG-----KSSRVGRQVMQE----
ghrelin_Hsap  MPSPGTVCSILLII----GMFWLDLAMAGSSFLSPEHQRVQQRKESKKPPAKLQPRALAGWLRPEDGGQ--
ghrelin_Ajap  MRQMKRTAYIIILLVC-VLAIWMDSVQAGSSFLSPS----QRPQGD-----KKPPRVGRRDSDGILD
ghrelin_Ipun  MLGHGRVGHMILLIC-AFSTWAEIVMCGSSFLSPT----QKPQNRG-----DRKPPRVGRRTAEE----
motilin_Hsap  MVSARKAVAALLVVHV-AAMLASQTEAFVPIFTYGELQRMQEKERNKG-----QKKSLSVWQRSGEEGPVD
motilin_Oana  MVSARKAVAFLLVSV-AAMMA---EGFIPIFTHSDVQRMQERERNKG-----QKKSLLTVQQRSEQGLRT
Motilin_Ocun  MVSARKAVAALLLVHV-TAMLASQTEAFVPIFTYSELQRMQERERNRG-----HKKSLSVQQRSDAAAAPR
Motilin_Psin  MVSARKVVASLLVVYV-AAMLAGQTEGYLAFFTRSDIERMQERERNKA-----QKKSLLMQKRSESGDVTE
<--- signal peptide ---> <-- ghrelin/motilin -->

```

```

                80           *           100           *           120           *           140
ghrelin_Drer  -PEIPVIKED-DRFMMSAPFELSMSLSEAEYEKYGPVILQNLLENLIRDSSFEF~~~~~
ghrelin_Asch  ----PQQPTDDKHITISAPFEIGISMTEEDYDEYGVVLOEIIQRLIGGTEAAEGPPQL~~~~~
ghrelin_Hsap  ----AEGAEDELEVRFNAPFDVGIKISGVOYQQHSQALGKFIQDIIWEEAKEAPADK~~~~~
ghrelin_Ajap  FMRPPLQDEDIRHITFNTPEEIGITMTEELFQQYGEVMQKIMQD~~~~~
ghrelin_Ipun  -LEAPLPSE--EKIMVSAPFQLAVSLSDAEYEDYGPVILQRMILLDVLGDPPTLDGAN~~~~~
motilin_Hsap  -PAEPIREEENEMIKLTAPLEIGMRMNSROLEKYPATLEGLISEMIPQHAAK~~~~~
motilin_Oana  -LAEPNGEEEGEIIQLAAPVEIGLRMNSROLAKYRGILEELIMEALLSTQNGESNPDRGRGRCS~~~~~
Motilin_Ocun  -PAEPTLEEEENGRMQLTAPVEIGMRMNSROLEKYRAALEAAERAVHPDAPSRPCWPAGGESGWSGEPSP
Motilin_Psin  -LS-AESVAEAGEIVTLTAPGETSMRHSAGOLEKYQHVLKELLTEMLDAQNVN~~~~~
<----- obestatin domain ----->

```

## 37. Alignment of chordate somatostatin/cortistatin-like precursors

```

                *           20           *           40           *           60           *
SMS_Hsap  MLSCRLQCALAALSIVLALGCVTGAPSDPRLRQFLQKSLAAAAG-KQELAKYFL-A---ELLSEPNQTE-
Cort_Hsap MPLSPGLLLLLLISGAT----ATAALPLEGGPTGRDSEHMQEAAGIRKSSILTFE-A---WWFE--WTSQ-
SMS1_Trub MQLL--VVLAAALTGVLLSIRAAAVLPVEERSPVHLNRELSKE---RKELILKLV-S---GLLDGALDTN-
SMS2_Trub MQRHSSTIIMLTTLVL---CIQGVSSQPDRDLNQNQDLEMEVR-HHRLIQHVHGA---GLLSQEWKRA
SMS_Bflo  MKNLHAFLEFLSVLTLVVVWTSAEILPYQQSVDDMDRAQLDDEISPPYEDLAEAKEAAAYWIILRKALLEN-
<-- signal peptide -->

```

```

                80           *           100           *           120           *
SMS_Hsap  -----NDALEPEDLSQAAEQDEMRLLELQRSANSNPAMAPRERKAGCKNFFWKTFTSC~
Cort_Hsap -----ASA-GPL-----IGEEAREVARRQEGAPPQQSARRDRMPCRNFFWKTFSCK
SMS1_Trub -----MLPMETVDLEEPLESRLE-ERAVYNRLSLPQDRDRKAPCKNFFWKTFTSC~
SMS2_Trub VEDLIAQMSMPEGTGQRDTEVVSMATGGRMNLERSVDTTNNLSPPERKAGCKNFYWKGPTSC~
SMS_Bflo  -----PPGKPAHARNVMDTDEESRESLRTTVVQRLA---KRWKVKCNNAYWK-FCKG~
<-somatostatin->

```

## 38. Alignment of protostomian allatostatin C-like precursors

```

      *      20      *      40      *      60      *      80
AstC_Ctel  M-----VPSKSVCAIVVVMSCYVLCGFIVNAVPTQDGG-----SNLSHGYNE-----VSE
AstC_Hrob  M-----KNVTFLLAMSATILLLLASALPPRRRSL-----ISKNYIFPK-----THSKR
AstC_Lgig  M-----KSLPVTTLTLCICLNEVSSNKILPGEEH-----RQLVQITEE-----
AstC_Cgig  M-----ELTQSVFVLKLYAAVVAVLLVAEVHAQPQKF-----STEIQQTGD-----
AstC_Acal  MSVSVRTWRAVNTCLLTLTLWADVLVRAAVIPVSSP-----EPMEEASAL-----
AstC_Dpul  M-----MAKISAVVPVAIILLYLAASGAAKSTDREETE-----STDFGQDIE-----V
AstC_Tcas  M-----AAQLPRYTKTLFIFLIATLVVANARPNHFGDASQ-----NSISGLKFQ-----V
Ast-C_Dmel M-----MKFVQILLCYGLLLTFFFALSEARPSGAETG-----PDSGLDGDQDAEDVRGAYGGGYDMPAQA
Ast-CC_Dmel M-----VVPKRAALLDRIMVALHHALEQERSEQRIGEFFGDRNILSGKFGDSHNGMEHH-----QAREDMYSDDDAG
AstC1_Cele M-----VKFFVFLIFFAFLCSFTSAIPLRSLFL-----RSYDDINQE-----
AstC2_Cele M-----MAQKTLIAVMIVCSI-----
AstC3_Cele M-----RVLTEFLVTLF-ALANVMQAQRYDRAIYE-----ALLNDLERE-----
AstC4_Cele M-----KSSSVLSVALIVLVIVQLISASLASVPSS-----SAVSDGQID-----
AstC5_Cele M-----SSGKLFQFFIVFLATLLLLADAIPMVSSR-----DEDDQIIQK-----
<----- signal peptide ----->

```

```

      *      100      *      120      *      140      *
AstC_Ctel  MGLTDTKLAFLLEKKLREEIERDLADLLVMEHQHRH--NLNFIQEKKRQLEIKKREPV----QCLVNIVSCW----KRR
AstC_Hrob  FAKNDAEDPLYSSYPFEYNNNEPISMDSNKYANS--LNKEFPKAPKQVFKKAHV----PCLFSIISCW----K
AstC_Lgig  --SSNDRLLKRSTLQDAYESH LAMLMEAEQSLTK--QIEELKLRREELSNRKRSHV----MCLVNLISCF----RKR
AstC_Cgig  --ESSTDLNLFKMALREAYNRELEFYEQQEAQIVK--QLAALENDRNQIRERKRSHI----RCLVNVIIACY----RKK
AstC_Acal  ---QLLPGKIGRASLLREMERQLMILQAAEENIVS--GLQEELEERRVLSGRKRSHY---SSMOMFNVVACY---RKRK
AstC_Dpul  LGAVPDDGGSVETALLNYLFAKQIVARLRTNAN----PQDLMRKRSY-----WKQCAFNAVSCF----GK
AstC_Tcas  VGEPADGNNLLDSRLK-PWELEMLVQRLSEISSQT--GGDFAWDKSIRLPEAKRQSR---YRQCYFNPIISCF----RK
Ast-C_Dmel IYPNIPMDRLQMLFAQYRPTSYSAYLRSPTYGNVN--ELYRLPESKRQVR-----YRQCYFNPIISCF----RK
Ast-CC_Dmel TLLDYDFKDLNQINRATGETRRAGADRSQT----S--THSGSPAGSRRIQPSGSGGG-RAYWRCYFNNAVSCF~~~~~
AstC1_Cele -----SIARGYFAPQPVDDDNADNRPKR--GIDLLKRRVEIE-----RNRCLFFNPIITCY~~~~~
AstC2_Cele -----LQPMLALGSLTPSAAFRANMQQRERSPNTLFYMDGASKQYGDEIKDPYKRFKPCYYSPIQCL---IKRK
AstC3_Cele -----FVERELAQHVLKRELLRQDRQ--ELDRVRRASEKKS-----PRNCYFSPIQCL---FTRN
AstC4_Cele -----FDALAAKIEMLRPNRYWKRAHNIDTR--ALNQ-----FKNCYFSPIQCVLMERRRK
AstC5_Cele -----RLSNDALIRLLMRNRGTQ--TQLGLKRGVLVKKAEVERRSIDEDFSNCFLSPVQCM-LPSSRK
<- allatostatin C->

```

General references:

Petersen, T. N., Brunak S., et al. (2011). "SignalP 4.0: discriminating signal peptides from transmembrane regions." *Nat Methods* 8(10): 785-6.

Veenstra, JA. (2010). "Neurohormones and neuropeptides encoded by the genome of *Lottia gigantea*, with reference to other mollusks and insects." *Gen Comp Endocrinol.*167(1):86-103.

Veenstra, JA. (2011). "Neuropeptide evolution: neurohormones and neuropeptides predicted from the genomes of *Capitella teleta* and *Helobdella robusta*." *Gen Comp Endocrinol.*171(2):160-75.
